# Supplementary material for: New interpretable machine learning method for single-cell data reveals correlates of clinical response to cancer immunotherapy
Source: bioRxiv or medRxiv preprint supplement (doi:10.1101/702118), 2019-12-08
Supplement: Supplementary file [file media-1.pdf]

## 796 A Supplementary materials

### 797 A.1 Summary of CITN clinical trials

|                                                        | CITN-07                                                                                                                                                                                                                                                                                                                                                                             | CITN-09                                                                                                                                                                                          |
|--------------------------------------------------------|-------------------------------------------------------------------------------------------------------------------------------------------------------------------------------------------------------------------------------------------------------------------------------------------------------------------------------------------------------------------------------------|--------------------------------------------------------------------------------------------------------------------------------------------------------------------------------------------------|
| ClinicalTrials.gov Identifier*                         | NCT02129075                                                                                                                                                                                                                                                                                                                                                                         | NCT02267603                                                                                                                                                                                      |
| Study Type*                                            | Interventional (Clinical Trial)                                                                                                                                                                                                                                                                                                                                                     | Interventional (Clinical Trial)                                                                                                                                                                  |
| Intervention Model*                                    | Parallel Assignment                                                                                                                                                                                                                                                                                                                                                                 | Single Group Assignment                                                                                                                                                                          |
| Masking*                                               | None (Open Label)                                                                                                                                                                                                                                                                                                                                                                   | None (Open Label)                                                                                                                                                                                |
| Enrollment*                                            | 100 participants (Estimated, recorded 6/11/2019)                                                                                                                                                                                                                                                                                                                                    | 50 participants (Actual, recorded 6/11/2019)                                                                                                                                                     |
| Primary Purpose*                                       | Treatment                                                                                                                                                                                                                                                                                                                                                                           | Treatment                                                                                                                                                                                        |
| Actual Study Start Date*                               | April 9, 2014                                                                                                                                                                                                                                                                                                                                                                       | November 25, 2014                                                                                                                                                                                |
| Primary Completion Date*                               | February 2, 2020 (Estimated, recorded 6/11/2019)                                                                                                                                                                                                                                                                                                                                    | February 6, 2018 (Actual, recorded 6/11/2019)                                                                                                                                                    |
| Total number of longitudinal samples analyzed by FAUST | 358                                                                                                                                                                                                                                                                                                                                                                                 | 78 (T cell pane), 55 (Myeloid panel)                                                                                                                                                             |
| Total number of baseline samples (pre-treatment)       | 32                                                                                                                                                                                                                                                                                                                                                                                  | 27 (T cell panel), 15 (Myeloid panel)                                                                                                                                                            |
| Phase*                                                 | Phase 2                                                                                                                                                                                                                                                                                                                                                                             | Phase 2                                                                                                                                                                                          |
| Intervention/Treatment*                                | Biological: DEC-205/NY-ESO-1 Fusion Protein CDX-1401 Other: Laboratory Biomarker Analysis Biological: Neoantigen-based Melanoma-Poly-ICLC Vaccine Other: Pharmacological Study Biological: Recombinant Flt3 Ligand                                                                                                                                                                  | Biological: Pembrolizumab Other: Laboratory Biomarker Analysis                                                                                                                                   |
| Condition/Disease*                                     | Cutaneous Melanoma Mucosal Melanoma NY-ESO-1 Positive Tumor Cells Present Ocular Melanoma Stage IIB Cutaneous Melanoma AJCC v6 and v7 Stage IIC Cutaneous Melanoma AJCC v6 and v7 Stage III Cutaneous Melanoma AJCC v7 Stage IIIA Cutaneous Melanoma AJCC v7 Stage IIIB Cutaneous Melanoma AJCC v7 Stage IIIC Cutaneous Melanoma AJCC v7 Stage IV Cutaneous Melanoma AJCC v6 and v7 | Recurrent Merkel Cell Carcinoma Stage III Merkel Cell Carcinoma AJCC v7 Stage IIIA Merkel Cell Carcinoma AJCC v7 Stage IIIB Merkel Cell Carcinoma AJCC v7 Stage IV Merkel Cell Carcinoma AJCC v7 |

Table S1: Data listed in all rows with \* taken from <https://clinicaltrials.gov> on June 11, 2019.

798 **A.2 Baseline predictors MCC anti-PD-1 trial myeloid phenotyping panel**

| Population                                                                            | Effect Size | Lower 2.5% | Upper 97.5% | BonferroniP |
|---------------------------------------------------------------------------------------|-------------|------------|-------------|-------------|
| CD33 Bright CD16- CD15- HLADR Bright<br>CD14- CD3- CD11B- CD20- CD19- CD56-<br>CD11C+ | 2.611       | 1.073      | 4.162       | 0.041       |
| CD33 Bright CD16- CD15- HLADR Bright<br>CD14- CD3- CD11B+ CD20- CD19- CD56-<br>CD11C+ | 2.776       | 1.316      | 4.274       | 0.009       |
| CD33 Bright CD16- CD15- HLADR Bright<br>CD14+ CD3- CD11B+ CD20- CD19- CD56-<br>CD11C+ | 3.558       | 1.837      | 5.284       | 0.002       |
| CD33 Bright CD16- CD15+ HLADR Bright<br>CD14+ CD3- CD11B+ CD20- CD19- CD56-<br>CD11C+ | 3.689       | 1.859      | 5.823       | 0.007       |
| CD33 Bright CD16+ CD15+ HLADR Bright<br>CD14+ CD3- CD11B+ CD20- CD19- CD56-<br>CD11C+ | 4.754       | 2.353      | 7.578       | 0.011       |

Table S2: All statistically significant (bonferroni adjusted significance threshold of 5%) from the MCC anti-PD-1 trial.

799 **A.3 Baseline predictors FLT3-L + therapeutic Vx trial.**

800 The complete set of baseline predictors from the FLT3-L + therapeutic Vx trial are listed in Table  
 S3. The top populations, by magnitude, were CD14+CD16- monocyte populations.

| Population                                                      | estimate | lower | upper | std.error | statistic | p.value  | adjusted.p.value |
|-----------------------------------------------------------------|----------|-------|-------|-----------|-----------|----------|------------------|
| CD8-CD3-HLA DRbright CD4-CD19-CD14+CD11C+CD123-CD16-CD56-       | 2.44     | 1.16  | 3.73  | 0.66      | 3.73      | 9.70e-05 | 0.01             |
| CD8-CD3-HLA DRdimCD4-CD19-CD14+CD11C+CD123-CD16-CD56-           | 2.26     | 1.22  | 3.31  | 0.54      | 4.23      | 1.17e-05 | 0.00             |
| CD8dim CD3-HLA DRbright CD4-CD19-CD14+CD11C+CD123-CD16-CD56-    | 2.14     | 0.98  | 3.29  | 0.59      | 3.62      | 1.46e-04 | 0.02             |
| CD8dim CD3-HLA DRdim CD4-CD19-CD14-CD11C-CD123-CD16+CD56+       | 1.91     | 0.93  | 2.89  | 0.50      | 3.82      | 6.67e-05 | 0.01             |
| CD8dim CD3-HLA DR-CD4-CD19-CD14-CD11C-CD123-CD16+CD56+          | 1.60     | 0.73  | 2.47  | 0.44      | 3.59      | 1.64e-04 | 0.02             |
| CD8-CD3-HLA DRdim CD4-CD19-CD14-CD11C-CD123-CD16+CD56+          | 1.60     | 0.69  | 2.50  | 0.46      | 3.47      | 2.65e-04 | 0.03             |
| CD8bright CD3+HLA DRbright CD4-CD19-CD14-CD11C-CD123-CD16-CD56- | 1.50     | 0.71  | 2.29  | 0.40      | 3.72      | 1.01e-04 | 0.01             |
| CD8dim CD3-HLA DRdim CD4-CD19-CD14-CD11C-CD123-CD16+CD56-       | 1.23     | 0.75  | 1.70  | 0.24      | 5.07      | 2.01e-07 | 0.00             |
| CD8-CD3-HLA DRbright CD4-CD19-CD14-CD11C-CD123-CD16-CD56-       | 1.22     | 0.60  | 1.83  | 0.32      | 3.85      | 5.90e-05 | 0.01             |
| CD8-CD3-HLA DRdimCD4-CD19-CD14-CD11C-CD123-CD16+CD56-           | 1.12     | 0.68  | 1.56  | 0.22      | 5.02      | 2.64e-07 | 0.00             |
| CD8dim CD3-HLA DR-CD4-CD19-CD14-CD11C-CD123-CD16+CD56-          | 0.97     | 0.58  | 1.35  | 0.20      | 4.92      | 4.34e-07 | 0.00             |
| CD8-CD3-HLA DR-CD4-CD19-CD14-CD11C-CD123-CD16+CD56-             | 0.92     | 0.53  | 1.30  | 0.20      | 4.67      | 1.49e-06 | 0.00             |
| CD8-CD3-HLA DRdim CD4-CD19-CD14-CD11C-CD123-CD16-CD56-          | 0.75     | 0.31  | 1.19  | 0.22      | 3.38      | 3.64e-04 | 0.05             |

Table S3: All statistically significant (bonferroni adjusted significance threshold of 5%) from the FLT3-L + therapeutic Vx trial.

801

802 **A.4 Alternative normalization of PD-1 dim T cell biomarker in CITN-09 cor-**  
 803 **relates with clinical outcome in CITN-09**

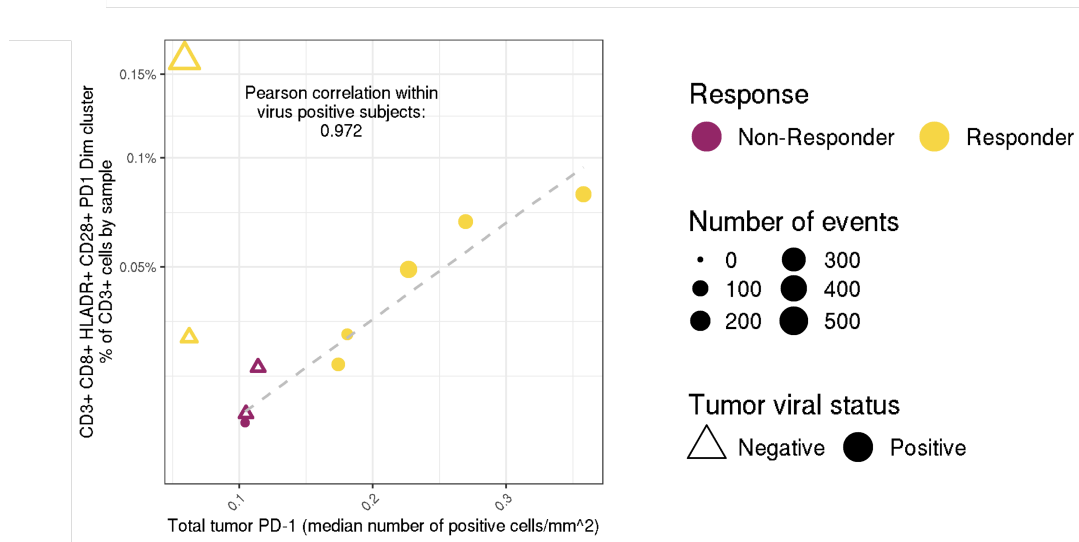

Figure S1: This figure is the same FAUST sub-population reported in figure 3 – CD4- CD3+ CD8+ CD45RA- HLA-DR+ CD28+ PD-1 dim CD25- CD127- CCR7- – normalized by the total count of CD3+ FAUST sub-populations by sample in panel C, displayed here.

804 **A.5 Additional sub-populations associated with with clinical outcome at base-**  
 805 **line in CITN-09**

806 The figures in this sub-section are the remaining sub-populations discovered and annotated by  
 807 FAUST that are associated with clinical outcome at the FDR-adjusted 5% level.

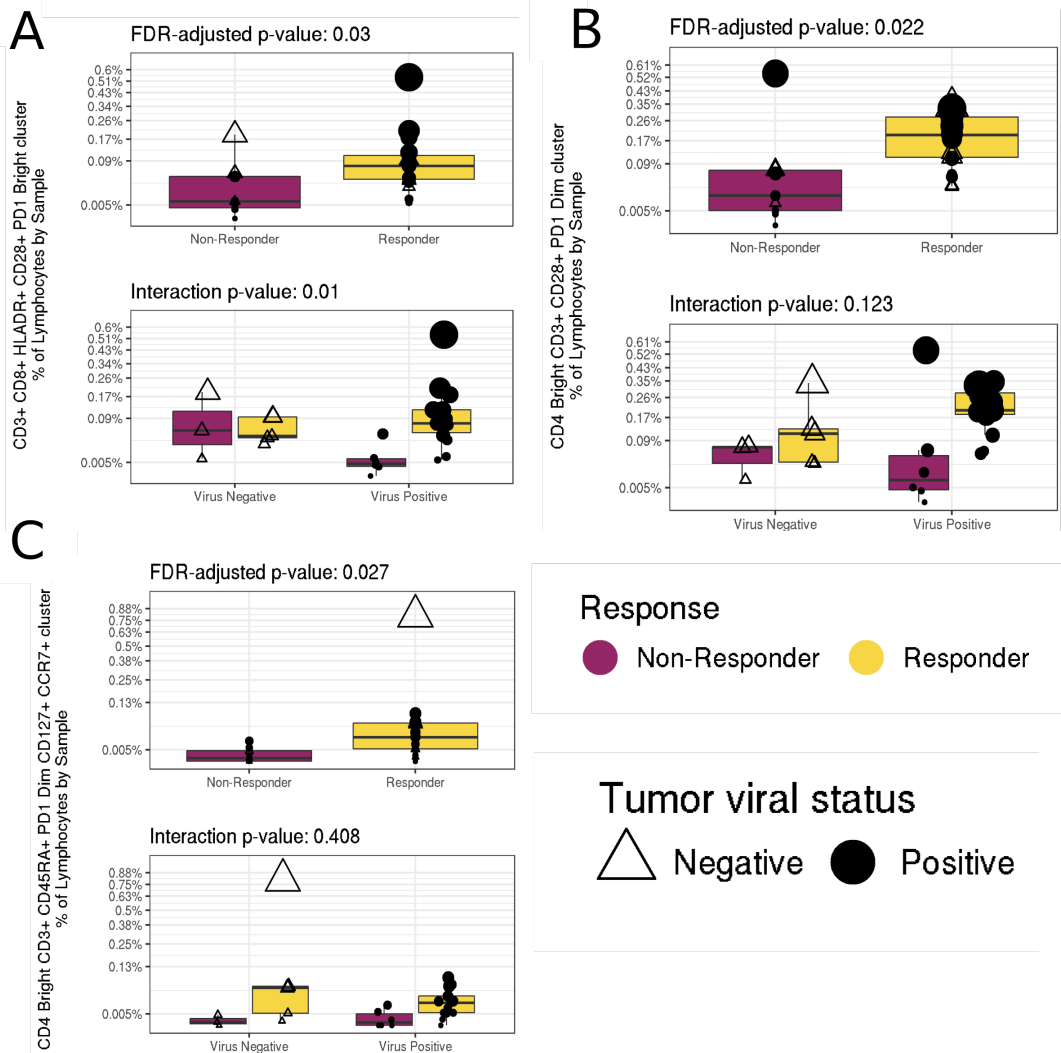

Figure S2: Panel A: The FAUST sub-population annotated CD4- CD3+ CD8+ CD45RA- HLA-DR+ CD28+ PD-1 bright CD25- CD127- CCR7- that is associated with clinical outcome at the FDR-adjusted 5% level. Panel B: The FAUST sub-population annotated CD4 bright CD3+ CD8- CD45RA- HLA-DR- CD28+ PD-1 dim CD25- CD127- CCR7- that is associated with clinical outcome at the FDR-adjusted 5% level. Panel C: The FAUST sub-population annotated CD4 bright CD3+ CD8- CD45RA+ HLA-DR- CD28- PD-1 dim CD25- CD127+ CCR7+ that is associated with clinical outcome at the FDR-adjusted 5% level.

---

**808 A.6 Effect Sizes and Confidence Intervals in CITN-09**

| Population                                                                | Effect Size | Lower 2.5% | Upper 97.5% |
|---------------------------------------------------------------------------|-------------|------------|-------------|
| CD4- CD3+ CD8+ CD45RA- HLA-DR+<br>CD28+ PD-1+ CD25- CD127- CCR7-          | 1.844       | 0.784      | 2.955       |
| CD4- CD3+ CD8+ CD45RA- HLA-DR+<br>CD28+ PD-1 dim CD25- CD127- CCR7-       | 1.896       | 0.898      | 2.981       |
| CD4 bright CD3+ CD8- CD45RA- HLA-DR-<br>CD28+ PD-1 dim CD25- CD127- CCR7- | 1.907       | 0.929      | 2.941       |
| CD4 bright CD3+ CD8- CD45RA+ HLA-DR-<br>CD28- PD-1 dim CD25- CD127+ CCR7+ | 2.999       | 1.387      | 4.837       |

---

## 809 **A.7 Alternative analysis of CITN-09 T cell panel**

810 As described in the main text, we re-analyzed the MCC anti-PD-1 T cell dataset described in  
811 section 2.1 with the clustering methods *densityCut* [38], *FlowSOM* [5], *Phenograph* [39], and FAUST.  
812 We ran each method on live lymphocytes from all 78 experimental samples as well as from the  
813 27 baseline samples alone, transforming samples using both the biexponential as well as the  
814 hyperbolic arcsine. For all non-FAUST methods, samples were combined before clustering in  
815 all scenarios, and we set tuning parameters to the settings reported in [4] when possible. After  
816 testing for differential abundance between responders and non-responders using counts derived  
817 from each method's clusterings, three clusters defined by *densityCut* were significantly associated  
818 with response to therapy at the FDR-adjusted 0.20 level (Supplementary Table S4), but none of  
819 these represented T cells (Supplementary Figure S3). No other clusters produced by *densityCut*,  
820 *FlowSOM*, or *Phenograph* were associated with response to therapy at this level of significance. On  
821 the other hand, FAUST repeatedly found that CD28+ HLA-DR+ PD-1 expressing effector-memory  
822 CD8 T cells as well as CD28+ PD-1 expressing CD4 T cells were associated with response to  
823 therapy at baseline across all tested conditions at the FDR-adjusted 5% level.

| Method     | Num Clusters | Transformation | Input Data | Best FDR | Second FDR |
|------------|--------------|----------------|------------|----------|------------|
| DensityCut | 2599         | Biexp          | Baseline   | 0.09     | 1.00       |
| DensityCut | 2570         | Asinh          | Baseline   | 0.83     | 0.83       |
| DensityCut | 6389         | Biexp          | All        | 0.00     | 0.22       |
| DensityCut | 6166         | Asinh          | All        | 0.00     | 1.00       |
| FlowSOM    | 100          | Asinh          | Baseline   | 0.62     | 0.62       |
| FlowSOM    | 400          | Asinh          | Baseline   | 0.53     | 0.53       |
| FlowSOM    | 100          | Biexp          | Baseline   | 0.49     | 0.71       |
| FlowSOM    | 400          | Biexp          | Baseline   | 0.58     | 0.58       |
| FlowSOM    | 100          | Asinh          | All        | 0.64     | 0.64       |
| FlowSOM    | 400          | Asinh          | All        | 0.43     | 0.43       |
| FlowSOM    | 100          | Biexp          | All        | 0.65     | 0.65       |
| FlowSOM    | 400          | Biexp          | All        | 0.29     | 0.29       |
| Phenograph | 46           | Asinh          | Baseline   | 0.35     | 0.35       |
| Phenograph | 45           | Biexp          | Baseline   | 0.36     | 0.36       |
| Phenograph | 47           | Asinh          | All        | 0.31     | 0.31       |
| Phenograph | 49           | Biexp          | All        | 0.34     | 0.34       |
| FAUST      | 267          | Biexp          | Baseline   | 0.03     | 0.03       |
| FAUST      | 290          | Asinh          | Baseline   | 0.00     | 0.02       |
| FAUST      | 238          | Biexp          | All        | 0.02     | 0.02       |
| FAUST      | 239          | Asinh          | All        | 0.00     | 0.00       |

Table S4: Results of applying the clustering methods DensityCut [38], FAUST, FlowSOM [5], and Phenograph [39] to flow cytometry data stained to investigate T cell activity from the MCC anti-PD-1 trial. Tuning parameters for FlowSOM and Phenograph (including the number of clusters for FlowSOM) were set to the parameter settings reported in [4]. There, the supporting table "cytoa23030-sup-0001-suppinfo.xlsx" reports that Phenograph is run with  $k = 30$  neighbors and using the Euclidean metric. "FlowSOM pre" is reported as running with 100 and 400 clusters with "transform=FALSE" and "scale=FALSE". Flow cytometry data are reported as being transformed by the hyperbolic arcsine transformation with cofactor 120. Here, we transform data using both the biexponential transformation (used by CITN on the "Biexp" rows) as well as the hyperbolic arcsine with cofactor 120 (The "Asinh" rows). DensityCut was run totally unsupervised: the  $K$  parameter is set to its default value  $\log_2(N)$ . Samples were concatenated before analysis by each method except FAUST, which was run at the sample level for all analyses. Rows with "Input data" listing "Baseline" only combine patient samples from the baseline time point, while those list "All" have samples from all time points combined prior to analysis. The reported FAUST number of clusters is the number of clusters with "CD3+" annotations. The tuning parameters for FAUST in the "Asinh" runs and the baseline "Biexp" run were taken from the FAUST "Biexp" all run, which is reported in the paper. The channel bounds matrix was transformed to the "Asinh" runs by computing the empirical quantiles of the concatenated biexponentially transformed data corresponding to the bounds reported in supplementary section A.9.2, and then computing those quantiles on the transformed concatenated data. Similarly, the baseline phenotypic filtering threshold was scaled from the setting of 5 for the 78 all sample runs to the setting of 2 for the 27 baseline sample runs.



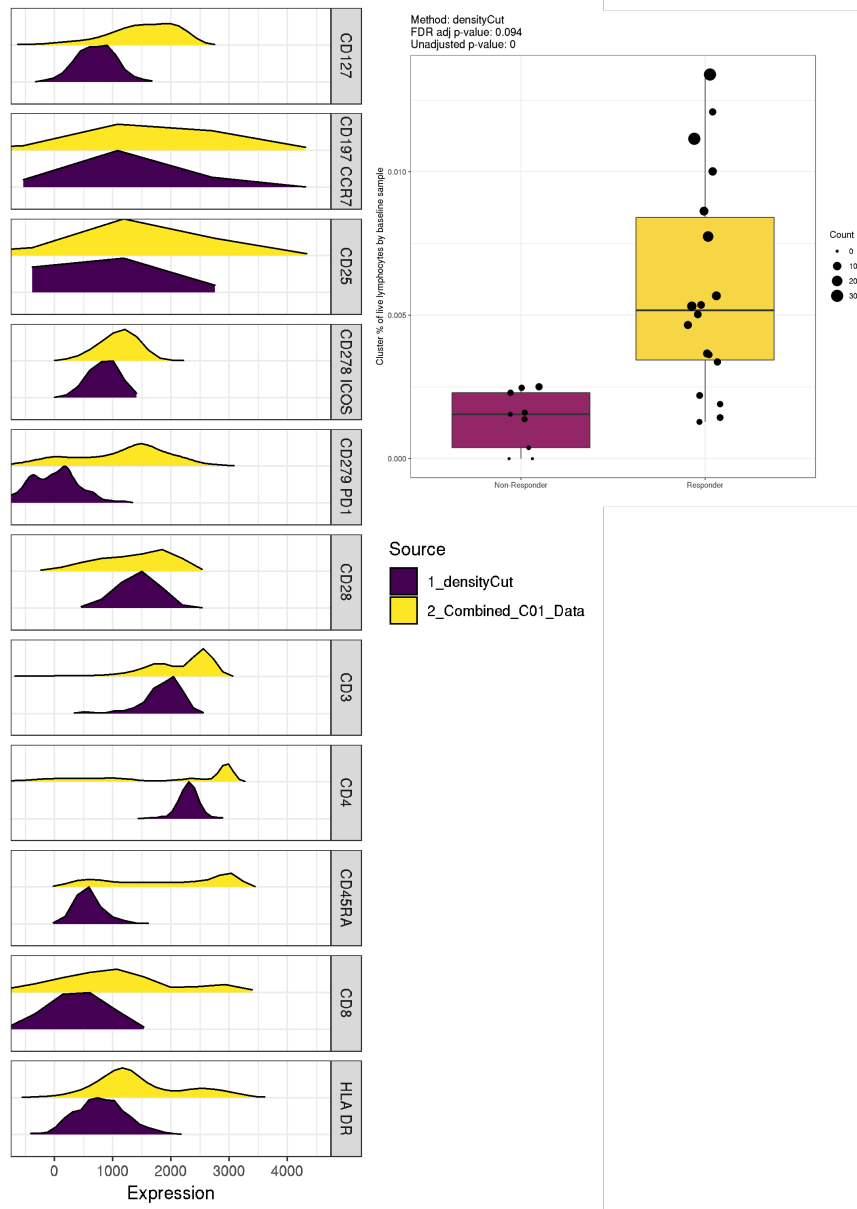

Figure S3: This figure shows the statistically significant correlate determined by running DensityCut on the baseline CITN-09 samples. DensityCut was installed using the command `devtools::install_bitbucket("jerry00/densitycut_dev")` in R 3.5.0, to install version 0.0.1 of the package. DensityCut was run unsupervised: the  $K$  parameter is set to its default value  $\log_2(N)$ . Two of the correlating densityCut clusters contained 2 and 20 cells in total across baseline samples, and were only measured in 1 and 2 of the 27 baseline subjects, respectively. We thus viewed the observed correlation for these clusters as artifactual. Plots of the third cluster's expression relative to the baseline samples (displayed in this figure) indicated that the cluster was CD3-, and so is not a T cell subset.

824 **A.8 Gating strategy modification examples****A**                      **Pre-Change**                      **B**                      **Post-Change**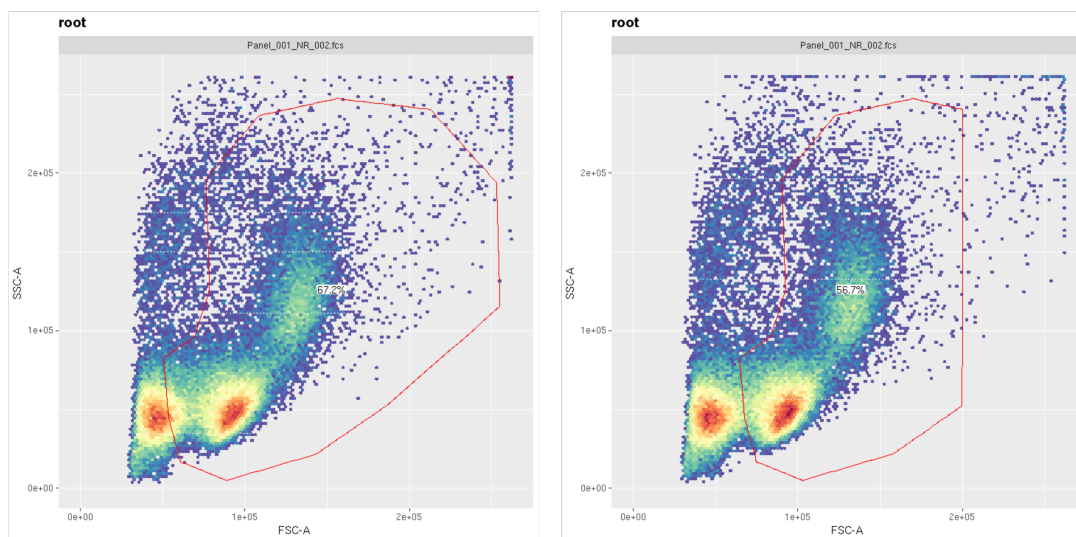

Figure S4: An example of modification to the manual gating strategy of the Krieg et al. FACS data. Panel A shows the initial manual gating strategy for the Lymphocytes of a sample. Panel B shows the same sample with the modified gate.

## 825 **A.9 FAUST tuning parameter settings for data analysis**

### 826 **A.9.1 CITN-07 Phenotyping panel**

827 The marker boundary matrix for CITN-07. Specific values were set by inspecting histograms of  
828 the individual markers across individual samples.

|        | Low     | High    |
|--------|---------|---------|
| CD123  | 1500.00 | 3000.00 |
| CD4    | 100.00  | 2500.00 |
| CD14   | 1.00    | 3000.00 |
| CD11C  | 1.00    | 3000.00 |
| CD56   | 1.00    | 3000.00 |
| CD8    | 1.00    | 3000.00 |
| CD16   | 1000.00 | 3000.00 |
| CD3    | 1.00    | 3000.00 |
| CD122  | 1000.00 | 3000.00 |
| CD19   | 1501.00 | 3000.00 |
| HLA DR | 1.00    | 3500.00 |

829 The selection quantile was set to 0.05. The selection threshold was set to  $1e - 7$ . The supervised  
830 list was used to encourage PD-1 to have two annotation boundaries estimated. The phenotype  
831 occurrence number was set to 70.

---

**832 A.9.2 CITN-09 T cell panel**

833 The marker boundary matrix. Non-zero values were set by inspecting histograms of the individual  
834 samples.

|            | Low     | High    |
|------------|---------|---------|
| CD278 ICOS | -500.00 | 3000.00 |
| CD3        | -500.00 | 3000.00 |
| CD127      | -500.00 | 3000.00 |
| CD197 CCR7 | 500.00  | 2250.00 |
| CD279 PD1  | -250.00 | 3500.00 |
| CD8        | 500.00  | 3000.00 |
| CD4        | 500.00  | 3000.00 |
| CD28       | -500.00 | 3000.00 |
| CD25       | 500.00  | 2250.00 |
| HLA DR     | -500.00 | 3000.00 |
| CD45RA     | 1000.00 | 3000.00 |

835 The selection quantile was set to 0.05. The selection threshold was set to The supervised  
836 list was used to encourage PD-1 to have two annotation boundaries estimated. The phenotype  
837 occurrence number was set to 5.

---

**838 A.9.3 CITN-09 Myeloid panel**

839 The marker boundary matrix. Non-zero values were set by inspecting histograms of the individual  
840 samples.

|        | Low      | High    |
|--------|----------|---------|
| CD11B  | 1000.00  | Inf     |
| CD20   | 1000.00  | Inf     |
| CD14   | 1000.00  | Inf     |
| CD11C  | 1000.00  | Inf     |
| CD56   | 2000.00  | Inf     |
| CD33   | -1000.00 | Inf     |
| CD16   | -Inf     | Inf     |
| CD3    | 1000.00  | Inf     |
| CD15   | 1000.00  | Inf     |
| CD19   | 1750.00  | Inf     |
| HLA DR | -1000.00 | 3750.00 |

841 The selection quantile was set to 0.50. The selection threshold was set to 0.05. The supervised  
842 list was used to encourage both CD33 and HLA-DR to have two annotation boundaries estimated.  
843 The phenotype occurrence number was set to 14.

---

844 **A.9.4 Krieg et al. CyTOF**

845 The marker boundary matrix. Upper bounds were set to the 99<sup>th</sup> quantiles across the dataset.  
 846 Lower boundes were set to zero by default. Non-zero values were set by concatenating experimen-  
 847 tal samples together by batch, and inspecting histograms of the concatenated batches.

|              | Low  | High |
|--------------|------|------|
| 209Bi_CD11b  | 0.00 | 5.55 |
| 162Dy_CD11c  | 0.00 | 5.28 |
| 163Dy_CD7    | 0.00 | 4.85 |
| 166Er_CD209  | 1.00 | 3.00 |
| 167Er_CD38   | 0.00 | 4.10 |
| 151Eu_CD123  | 0.00 | 3.89 |
| 153Eu_CD62L  | 0.00 | 4.57 |
| 152Gd_CD66b  | 2.00 | 4.00 |
| 154Gd_ICAM-1 | 0.00 | 4.95 |
| 155Gd_CD1c   | 0.00 | 2.30 |
| 156Gd_CD86   | 0.00 | 3.88 |
| 160Gd_CD14   | 0.00 | 4.33 |
| 165Ho_CD16   | 0.00 | 4.53 |
| 175Lu_PD-L1  | 0.00 | 3.73 |
| 146Nd_CD64   | 0.00 | 2.95 |
| 147Sm_CD303  | 2.00 | 4.00 |
| 148Sm_CD34   | 1.00 | 3.00 |
| 149Sm_CD141  | 0.00 | 3.96 |
| 150Sm_CD61   | 0.00 | 4.29 |
| 169Tm_CD33   | 0.00 | 3.68 |
| 89Y_CD45     | 0.00 | 5.25 |
| 173Yb_CD56   | 0.00 | 3.43 |
| 174Yb_HLA-DR | 0.00 | 5.89 |

848 The selection quantile was set to 1: after concatenating by batch, there were two experimental  
 849 units in this dataset.

850 The selection threshold was set to 0.05.

851 The supervised list was set to use only the lower-estimated gate for CD33 after selection and  
 852 standardization: the upper gate was deemed an artifact of concatenation by inspection. The  
 853 phenotype occurance number was kept at the default value of 1.

---

**854 A.9.5 Krieg et al. FACS**

855 The marker boundary matrix. Non-zero values were set by inspecting histograms of the individual  
856 samples.

|      | CD3  | CD4    | CD11b | CD33 | HLA-DR | CD56 | CD45RO | CD11c | CD16  | CD14 | CD19 |
|------|------|--------|-------|------|--------|------|--------|-------|-------|------|------|
| Low  | -Inf | -20.00 | -Inf  | -Inf | -Inf   | -Inf | -Inf   | -Inf  | 85.00 | -Inf | -Inf |
| High | Inf  | Inf    | Inf   | Inf  | Inf    | Inf  | Inf    | Inf   | Inf   | Inf  | Inf  |

857 The selection quantile was set to 0. The selection threshold was set to 0.01. The supervised list  
858 was not used. The phenotype occurrence number was set to 13.

---

## 859 A.10 Staining panels used in FAUST analyses

860 Staining panels from the experiments used in FAUST analyses are provided here.

### 861 A.10.1 CITN-09 T cell Staining Panel

|       | name                | desc       |
|-------|---------------------|------------|
| \$P1  | FSC-A               |            |
| \$P2  | FSC-H               |            |
| \$P3  | SSC-A               |            |
| \$P4  | SSC-H               |            |
| \$P5  | <PE-A>              | CD278 ICOS |
| \$P6  | <FITC-A>            | CD3        |
| \$P7  | <BV 421-A>          | CD127      |
| \$P8  | <Alexa Fluor 700-A> | CD197 CCR7 |
| \$P9  | <PE-Cy7-A>          | CD279 PD-1 |
| \$P10 | <PerCP-Cy5-5-A>     | CD8        |
| \$P11 | <APC-Cy7-A>         | CD4        |
| \$P12 | <ECD-A>             | CD28       |
| \$P13 | <APC-A>             | CD25       |
| \$P14 | PE-Cy5-A            |            |
| \$P15 | <AmCyan-A>          | CD45       |
| \$P16 | <BV 605-A>          | HLA DR     |
| \$P17 | <BV 650-A>          | CD45RA     |
| \$P18 | Time                |            |



## 862 A.10.2 CITN-09 Myeloid Staining Panel

|       | name                | desc   |
|-------|---------------------|--------|
| \$P1  | FSC-A               |        |
| \$P2  | FSC-H               |        |
| \$P3  | SSC-A               |        |
| \$P4  | SSC-H               |        |
| \$P5  | <PE-A>              | CD11B  |
| \$P6  | <FITC-A>            | CD20   |
| \$P7  | <BV 421-A>          | CD14   |
| \$P8  | <Alexa Fluor 700-A> | CD11C  |
| \$P9  | <PE-Cy7-A>          | CD56   |
| \$P10 | <PerCP-Cy5-5-A>     | CD33   |
| \$P11 | <APC-Cy7-A>         | CD16   |
| \$P12 | <ECD-A>             | CD3    |
| \$P13 | <APC-A>             | CD15   |
| \$P14 | <PE-Cy5-A>          | CD19   |
| \$P15 | <AmCyan-A>          | CD45   |
| \$P16 | <BV 605-A>          | HLA DR |
| \$P17 | BV 650-A            |        |
| \$P18 | Time                |        |

**863 A.10.3 CITN-07 Phenotyping Staining Panel**

|       | name                | desc   |
|-------|---------------------|--------|
| \$P1  | FSC-A               |        |
| \$P2  | FSC-H               |        |
| \$P3  | SSC-A               |        |
| \$P4  | SSC-H               |        |
| \$P5  | <PE-A>              | CD123  |
| \$P6  | <FITC-A>            | CD4    |
| \$P7  | <BV 421-A>          | CD14   |
| \$P8  | <Alexa Fluor 700-A> | CD11C  |
| \$P9  | <PE-Cy7-A>          | CD56   |
| \$P10 | <PerCP-Cy5-5-A>     | CD8    |
| \$P11 | <APC-Cy7-A>         | CD16   |
| \$P12 | <ECD-A>             | CD3    |
| \$P13 | <APC-A>             | CD122  |
| \$P14 | <PE-Cy5-A>          | CD19   |
| \$P15 | <AmCyan-A>          | CD45   |
| \$P16 | <BV 605-A>          | HLA DR |
| \$P17 | BV 650-A            |        |
| \$P18 | Time                |        |

## 864 A.10.4 Krieg et al. Myeloid CyTOF Panel

|       | name    | desc         |
|-------|---------|--------------|
| \$P1  | Bi209Di | 209Bi_CD11b  |
| \$P2  | Dy162Di | 162Dy_CD11c  |
| \$P3  | Dy163Di | 163Dy_CD7    |
| \$P4  | Er166Di | 166Er_CD209  |
| \$P5  | Er167Di | 167Er_CD38   |
| \$P6  | Eu151Di | 151Eu_CD123  |
| \$P7  | Eu153Di | 153Eu_CD62L  |
| \$P8  | Gd152Di | 152Gd_CD66b  |
| \$P9  | Gd154Di | 154Gd_ICAM-1 |
| \$P10 | Gd155Di | 155Gd_CD1c   |
| \$P11 | Gd156Di | 156Gd_CD86   |
| \$P12 | Gd160Di | 160Gd_CD14   |
| \$P13 | Ho165Di | 165Ho_CD16   |
| \$P16 | Lu175Di | 175Lu_PD-L1  |
| \$P18 | Nd146Di | 146Nd_CD64   |
| \$P22 | Sm147Di | 147Sm_CD303  |
| \$P23 | Sm148Di | 148Sm_CD34   |
| \$P24 | Sm149Di | 149Sm_CD141  |
| \$P25 | Sm150Di | 150Sm_CD61   |
| \$P26 | Tm169Di | 169Tm_CD33   |
| \$P27 | Y89Di   | 89Y_CD45     |
| \$P29 | Yb173Di | 173Yb_CD56   |
| \$P30 | Yb174Di | 174Yb_HLA-DR |

## 865 A.10.5 Krieg et al. FACS Panel

|       | name                        | desc   |
|-------|-----------------------------|--------|
| \$P1  | FSC-A                       |        |
| \$P2  | FSC-H                       |        |
| \$P3  | FSC-W                       |        |
| \$P4  | SSC-A                       |        |
| \$P5  | SSC-H                       |        |
| \$P6  | SSC-W                       |        |
| \$P7  | Comp-Brilliant Violet 785-A | CD3    |
| \$P8  | Comp-Brilliant Violet 711-A | CD4    |
| \$P9  | Comp-Brilliant Violet 421-A | CD11b  |
| \$P10 | Comp-PerCP-Cy5-5-A          | CD33   |
| \$P11 | Comp-FITC-A                 | HLA-DR |
| \$P12 | Comp-PE-Cy7-A               | CD56   |
| \$P13 | Comp-PE-Texas Red-A         | CD45RO |
| \$P14 | Comp-APC-Cy7-A              | NIR    |
| \$P15 | Comp-Alexa Fluor 700-A      | CD11c  |
| \$P16 | Comp-APC-A                  | CD16   |
| \$P17 | Comp-PE-A                   | CD14   |
| \$P18 | Comp-Brilliant Violet 605-A | CD19   |
| \$P19 | Time                        |        |

## 866 A.11 Manual gating strategies

867 Manual gating strategies for analyzed trials are included here.

### 868 A.11.1 CITN-09 T cell Manual Gating Strategy

|    |                                                  |
|----|--------------------------------------------------|
| 1  | root                                             |
| 2  | /Singlets                                        |
| 3  | /Singlets/45                                     |
| 4  | /Singlets/45/Lymphocytes                         |
| 5  | /Singlets/45/Lymphocytes/CD3                     |
| 6  | /Singlets/45/Lymphocytes/CD3/4                   |
| 7  | /Singlets/45/Lymphocytes/CD3/4/CD25+             |
| 8  | /Singlets/45/Lymphocytes/CD3/4/CD25+CD45RA+CCR7+ |
| 9  | /Singlets/45/Lymphocytes/CD3/4/CD25+CD45RA+CCR7- |
| 10 | /Singlets/45/Lymphocytes/CD3/4/CD25+CD45RA-CCR7+ |
| 11 | /Singlets/45/Lymphocytes/CD3/4/CD25+CD45RA-CCR7- |
| 12 | /Singlets/45/Lymphocytes/CD3/4/CD25-CD45RA+CCR7+ |
| 13 | /Singlets/45/Lymphocytes/CD3/4/CD25-CD45RA+CCR7- |
| 14 | /Singlets/45/Lymphocytes/CD3/4/CD25-CD45RA-CCR7+ |
| 15 | /Singlets/45/Lymphocytes/CD3/4/CD25-CD45RA-CCR7- |
| 16 | /Singlets/45/Lymphocytes/CD3/4/CD28+             |
| 17 | /Singlets/45/Lymphocytes/CD3/4/CD28+CD45RA+CCR7+ |
| 18 | /Singlets/45/Lymphocytes/CD3/4/CD28+CD45RA+CCR7- |
| 19 | /Singlets/45/Lymphocytes/CD3/4/CD28+CD45RA-CCR7+ |
| 20 | /Singlets/45/Lymphocytes/CD3/4/CD28+CD45RA-CCR7- |
| 21 | /Singlets/45/Lymphocytes/CD3/4/28-CD45RA+CCR7+   |
| 22 | /Singlets/45/Lymphocytes/CD3/4/28-CD45RA+CCR7-   |
| 23 | /Singlets/45/Lymphocytes/CD3/4/28-CD45RA-CCR7+   |
| 24 | /Singlets/45/Lymphocytes/CD3/4/28-CD45RA-CCR7-   |
| 25 | /Singlets/45/Lymphocytes/CD3/4/CD45RA+           |
| 26 | /Singlets/45/Lymphocytes/CD3/4/278+              |

---

|    |                                                   |
|----|---------------------------------------------------|
| 27 | /Singlets/45/Lymphocytes/CD3/4/CCR7+              |
| 28 | /Singlets/45/Lymphocytes/CD3/4/HLADR+             |
| 29 | /Singlets/45/Lymphocytes/CD3/4/PD1+               |
| 30 | /Singlets/45/Lymphocytes/CD3/4/CD45RA+ICOS+CCR7+  |
| 31 | /Singlets/45/Lymphocytes/CD3/4/CD45RA+ICOS+CCR7-  |
| 32 | /Singlets/45/Lymphocytes/CD3/4/CD45RA+ICOS-CCR7+  |
| 33 | /Singlets/45/Lymphocytes/CD3/4/CD45RA+ICOS-CCR7-  |
| 34 | /Singlets/45/Lymphocytes/CD3/4/CD45RA+CCR7+       |
| 35 | /Singlets/45/Lymphocytes/CD3/4/CD45RA+CCR7+HLADR+ |
| 36 | /Singlets/45/Lymphocytes/CD3/4/CD45RA+CCR7+HLADR- |
| 37 | /Singlets/45/Lymphocytes/CD3/4/CD45RA+CCR7+PD1+   |
| 38 | /Singlets/45/Lymphocytes/CD3/4/CD45RA+CCR7+PD1-   |
| 39 | /Singlets/45/Lymphocytes/CD3/4/CD45RA+CCR7-       |
| 40 | /Singlets/45/Lymphocytes/CD3/4/CD45RA+CCR7-HLADR+ |
| 41 | /Singlets/45/Lymphocytes/CD3/4/CD45RA+CCR7-HLADR- |
| 42 | /Singlets/45/Lymphocytes/CD3/4/CD45RA+CCR7-PD1+   |
| 43 | /Singlets/45/Lymphocytes/CD3/4/CD45RA+CCR7-PD1-   |
| 44 | /Singlets/45/Lymphocytes/CD3/4/CD45RA-ICOS+CCR7+  |
| 45 | /Singlets/45/Lymphocytes/CD3/4/CD45RA-ICOS+CCR7-  |
| 46 | /Singlets/45/Lymphocytes/CD3/4/CD45RA-ICOS-CCR7+  |
| 47 | /Singlets/45/Lymphocytes/CD3/4/CD45RA-ICOS-CCR7-  |
| 48 | /Singlets/45/Lymphocytes/CD3/4/CD45RA-CCR7+       |
| 49 | /Singlets/45/Lymphocytes/CD3/4/CD45RA-CCR7+HLADR+ |
| 50 | /Singlets/45/Lymphocytes/CD3/4/CD45RA-CCR7+HLADR- |
| 51 | /Singlets/45/Lymphocytes/CD3/4/CD45RA-CCR7+PD1+   |
| 52 | /Singlets/45/Lymphocytes/CD3/4/CD45RA-CCR7+PD1-   |
| 53 | /Singlets/45/Lymphocytes/CD3/4/CD45RA-CCR7-       |
| 54 | /Singlets/45/Lymphocytes/CD3/4/CD45RA-CCR7-HLADR+ |
| 55 | /Singlets/45/Lymphocytes/CD3/4/CD45RA-CCR7-HLADR- |
| 56 | /Singlets/45/Lymphocytes/CD3/4/CD45RA-CCR7-PD1+   |

---

|    |                                                  |
|----|--------------------------------------------------|
| 57 | /Singlets/45/Lymphocytes/CD3/4/CD45RA-CCR7-PD1-  |
| 58 | /Singlets/45/Lymphocytes/CD3/4/CD45RA-           |
| 59 | /Singlets/45/Lymphocytes/CD3/4/treg              |
| 60 | /Singlets/45/Lymphocytes/CD3/8                   |
| 61 | /Singlets/45/Lymphocytes/CD3/8/CD25+             |
| 62 | /Singlets/45/Lymphocytes/CD3/8/CD25+CD45RA+CCR7+ |
| 63 | /Singlets/45/Lymphocytes/CD3/8/CD25+CD45RA+CCR7- |
| 64 | /Singlets/45/Lymphocytes/CD3/8/CD25+CD45RA-CCR7+ |
| 65 | /Singlets/45/Lymphocytes/CD3/8/CD25+CD45RA-CCR7- |
| 66 | /Singlets/45/Lymphocytes/CD3/8/CD25-CD45RA+CCR7+ |
| 67 | /Singlets/45/Lymphocytes/CD3/8/CD25-CD45RA+CCR7- |
| 68 | /Singlets/45/Lymphocytes/CD3/8/CD25-CD45RA-CCR7+ |
| 69 | /Singlets/45/Lymphocytes/CD3/8/CD25-CD45RA-CCR7- |
| 70 | /Singlets/45/Lymphocytes/CD3/8/CD28+             |
| 71 | /Singlets/45/Lymphocytes/CD3/8/CD28+CD45RA+CCR7+ |
| 72 | /Singlets/45/Lymphocytes/CD3/8/CD28+CD45RA+CCR7- |
| 73 | /Singlets/45/Lymphocytes/CD3/8/CD28+CD45RA-CCR7+ |
| 74 | /Singlets/45/Lymphocytes/CD3/8/CD28+CD45RA-CCR7- |
| 75 | /Singlets/45/Lymphocytes/CD3/8/28-CD45RA+CCR7+   |
| 76 | /Singlets/45/Lymphocytes/CD3/8/28-CD45RA+CCR7-   |
| 77 | /Singlets/45/Lymphocytes/CD3/8/28-CD45RA-CCR7+   |
| 78 | /Singlets/45/Lymphocytes/CD3/8/28-CD45RA-CCR7-   |
| 79 | /Singlets/45/Lymphocytes/CD3/8/CD45RA+           |
| 80 | /Singlets/45/Lymphocytes/CD3/8/278+              |
| 81 | /Singlets/45/Lymphocytes/CD3/8/CCR7+             |
| 82 | /Singlets/45/Lymphocytes/CD3/8/HLADR+            |
| 83 | /Singlets/45/Lymphocytes/CD3/8/PD1+              |
| 84 | /Singlets/45/Lymphocytes/CD3/8/CD45RA+ICOS+CCR7+ |
| 85 | /Singlets/45/Lymphocytes/CD3/8/CD45RA+ICOS+CCR7- |
| 86 | /Singlets/45/Lymphocytes/CD3/8/CD45RA+ICOS-CCR7+ |

|     |                                                   |
|-----|---------------------------------------------------|
| 87  | /Singlets/45/Lymphocytes/CD3/8/CD45RA+ICOS-CCR7-  |
| 88  | /Singlets/45/Lymphocytes/CD3/8/CD45RA+CCR7+       |
| 89  | /Singlets/45/Lymphocytes/CD3/8/CD45RA+CCR7+HLADR+ |
| 90  | /Singlets/45/Lymphocytes/CD3/8/CD45RA+CCR7+HLADR- |
| 91  | /Singlets/45/Lymphocytes/CD3/8/CD45RA+CCR7+PD1+   |
| 92  | /Singlets/45/Lymphocytes/CD3/8/CD45RA+CCR7+PD1-   |
| 93  | /Singlets/45/Lymphocytes/CD3/8/CD45RA+CCR7-       |
| 94  | /Singlets/45/Lymphocytes/CD3/8/CD45RA+CCR7-HLADR+ |
| 95  | /Singlets/45/Lymphocytes/CD3/8/CD45RA+CCR7-HLADR- |
| 96  | /Singlets/45/Lymphocytes/CD3/8/CD45RA+CCR7-PD1+   |
| 97  | /Singlets/45/Lymphocytes/CD3/8/CD45RA+CCR7-PD1-   |
| 98  | /Singlets/45/Lymphocytes/CD3/8/CD45RA-ICOS+CCR7+  |
| 99  | /Singlets/45/Lymphocytes/CD3/8/CD45RA-ICOS+CCR7-  |
| 100 | /Singlets/45/Lymphocytes/CD3/8/CD45RA-ICOS-CCR7+  |
| 101 | /Singlets/45/Lymphocytes/CD3/8/CD45RA-ICOS-CCR7-  |
| 102 | /Singlets/45/Lymphocytes/CD3/8/CD45RA-CCR7+       |
| 103 | /Singlets/45/Lymphocytes/CD3/8/CD45RA-CCR7+HLADR+ |
| 104 | /Singlets/45/Lymphocytes/CD3/8/CD45RA-CCR7+HLADR- |
| 105 | /Singlets/45/Lymphocytes/CD3/8/CD45RA-CCR7+PD1+   |
| 106 | /Singlets/45/Lymphocytes/CD3/8/CD45RA-CCR7+PD1-   |
| 107 | /Singlets/45/Lymphocytes/CD3/8/CD45RA-CCR7-       |
| 108 | /Singlets/45/Lymphocytes/CD3/8/CD45RA-CCR7-HLADR+ |
| 109 | /Singlets/45/Lymphocytes/CD3/8/CD45RA-CCR7-HLADR- |
| 110 | /Singlets/45/Lymphocytes/CD3/8/CD45RA-CCR7-PD1+   |
| 111 | /Singlets/45/Lymphocytes/CD3/8/CD45RA-CCR7-PD1-   |
| 112 | /Singlets/45/Lymphocytes/CD3/8/CD45RA-            |

Table S5: Manual gating strategy applied to CITN-09 T cell panel.



## 869 A.11.2 CITN-09 Myeloid Manual Gating Strategy

|    |                                                                                             |
|----|---------------------------------------------------------------------------------------------|
| 1  | root                                                                                        |
| 2  | /Singlets                                                                                   |
| 3  | /Singlets/45+                                                                               |
| 4  | /Singlets/45+/CD3-CD19-                                                                     |
| 5  | /Singlets/45+/CD3-CD19-/CD20-                                                               |
| 6  | /Singlets/45+/CD3-CD19-/CD20-/CD56-                                                         |
| 7  | /Singlets/45+/CD3-CD19-/CD20-/CD56-/HLADR-                                                  |
| 8  | /Singlets/45+/CD3-CD19-/CD20-/CD56-/HLADR-/CD16-                                            |
| 9  | /Singlets/45+/CD3-CD19-/CD20-/CD56-/HLADR-/CD16-/CD14+                                      |
| 10 | /Singlets/45+/CD3-CD19-/CD20-/CD56-/HLADR-/CD16-/CD14+/Q1: CD33-,<br>CD11B+                 |
| 11 | /Singlets/45+/CD3-CD19-/CD20-/CD56-/HLADR-/CD16-/CD14+/Q2: CD33+,<br>CD11B+ (m-MDSC)        |
| 12 | /Singlets/45+/CD3-CD19-/CD20-/CD56-/HLADR-/CD16-/CD14+/Q3: CD33+,<br>CD11B-                 |
| 13 | /Singlets/45+/CD3-CD19-/CD20-/CD56-/HLADR-/CD16-/CD14+/Q4: CD33-,<br>CD11B-                 |
| 14 | /Singlets/45+/CD3-CD19-/CD20-/CD56-/HLADR-/CD16-/CD14-CD15+                                 |
| 15 | /Singlets/45+/CD3-CD19-/CD20-/CD56-/HLADR-/CD16-/CD14-CD15+/Q1: CD33-,<br>CD11B+            |
| 16 | /Singlets/45+/CD3-CD19-/CD20-/CD56-/HLADR-/CD16-/CD14-CD15+/Q2: CD33+,<br>CD11B+ (PMN-MDSC) |
| 17 | /Singlets/45+/CD3-CD19-/CD20-/CD56-/HLADR-/CD16-/CD14-CD15+/Q3: CD33+,<br>CD11B-            |
| 18 | /Singlets/45+/CD3-CD19-/CD20-/CD56-/HLADR-/CD16-/CD14-CD15+/Q4: CD33-,<br>CD11B-            |
| 19 | /Singlets/45+/CD3-CD19-/CD20-/CD56-/HLADR-/CD16-/CD14-CD15-                                 |
| 20 | /Singlets/45+/CD3-CD19-/CD20-/CD56-/HLADR-/CD16-/CD14-CD15-/Q1: CD33-,<br>CD11B+            |

---

|    |                                                                                           |
|----|-------------------------------------------------------------------------------------------|
| 21 | /Singlets/45+/CD3-CD19-/CD20-/CD56-/HLADR-/CD16-/CD14-CD15-/Q2: CD33+,<br>CD11B+ (e-MDSC) |
| 22 | /Singlets/45+/CD3-CD19-/CD20-/CD56-/HLADR-/CD16-/CD14-CD15-/Q3: CD33+,<br>CD11B-          |
| 23 | /Singlets/45+/CD3-CD19-/CD20-/CD56-/HLADR-/CD16-/CD14-CD15-/Q4: CD33-,<br>CD11B-          |
| 24 | /Singlets/45+/CD14+                                                                       |
| 25 | /Singlets/45+/CD14-CD15+                                                                  |
| 26 | /Singlets/45+/CD14-CD15-                                                                  |

Table S6: Manual gating strategy applied to CITN-09 Myeloid panel.

## 870 A.11.3 CITN-07 Phenotyping Manual Gating Strategy

|    |                                                                |
|----|----------------------------------------------------------------|
| 1  | root                                                           |
| 2  | /Beads                                                         |
| 3  | /Non-beads                                                     |
| 4  | /Non-beads/Singlets                                            |
| 5  | /Non-beads/Singlets/45+                                        |
| 6  | /Non-beads/Singlets/45+/14+                                    |
| 7  | /Non-beads/Singlets/45+/14-                                    |
| 8  | /Non-beads/Singlets/45+/14-/3-19-                              |
| 9  | /Non-beads/Singlets/45+/14-/3-19-/56-16-                       |
| 10 | /Non-beads/Singlets/45+/14-/3-19-/56-16-/Basophils             |
| 11 | /Non-beads/Singlets/45+/14-/3-19-/56-16-/Basophils/HLA DR hi   |
| 12 | /Non-beads/Singlets/45+/14-/3-19-/56-16-/Basophils/HLA DR med  |
| 13 | /Non-beads/Singlets/45+/14-/3-19-/56-16-/Basophils/HLA DR neg  |
| 14 | /Non-beads/Singlets/45+/14-/3-19-/56-16-/HLADR+                |
| 15 | /Non-beads/Singlets/45+/14-/3-19-/56-16-/HLADR+/mDC            |
| 16 | /Non-beads/Singlets/45+/14-/3-19-/56-16-/HLADR+/mDC/HLADRhi    |
| 17 | /Non-beads/Singlets/45+/14-/3-19-/56-16-/HLADR+/mDC/HLADRmed   |
| 18 | /Non-beads/Singlets/45+/14-/3-19-/56-16-/HLADR+/mDC/HLA DR hi  |
| 19 | /Non-beads/Singlets/45+/14-/3-19-/56-16-/HLADR+/mDC/HLA DR med |
| 20 | /Non-beads/Singlets/45+/14-/3-19-/56-16-/HLADR+/mDC/HLA DR neg |
| 21 | /Non-beads/Singlets/45+/14-/3-19-/56-16-/HLADR+/pDC            |
| 22 | /Non-beads/Singlets/45+/14-/3-19-/56-16-/HLADR+/pDC/HLA DR hi  |
| 23 | /Non-beads/Singlets/45+/14-/3-19-/56-16-/HLADR+/pDC/HLA DR med |
| 24 | /Non-beads/Singlets/45+/14-/3-19-/56-16-/HLADR+/pDC/HLA DR neg |
| 25 | /Non-beads/Singlets/45+/Lymphocytes                            |
| 26 | /Non-beads/Singlets/45+/Lymphocytes/3+                         |
| 27 | /Non-beads/Singlets/45+/Lymphocytes/3+/4&8                     |
| 28 | /Non-beads/Singlets/45+/Lymphocytes/3+/4&8/56+                 |
| 29 | /Non-beads/Singlets/45+/Lymphocytes/3+/4&8/122+                |

|    |                                                             |
|----|-------------------------------------------------------------|
| 30 | /Non-beads/Singlets/45+/Lymphocytes/3+/4&8++                |
| 31 | /Non-beads/Singlets/45+/Lymphocytes/3+/4+                   |
| 32 | /Non-beads/Singlets/45+/Lymphocytes/3+/4+/HLADR+            |
| 33 | /Non-beads/Singlets/45+/Lymphocytes/3+/8+                   |
| 34 | /Non-beads/Singlets/45+/Lymphocytes/3+/8+/HLADR+            |
| 35 | /Non-beads/Singlets/45+/Lymphocytes/3-19-                   |
| 36 | /Non-beads/Singlets/45+/Lymphocytes/3-19-/16+56-            |
| 37 | /Non-beads/Singlets/45+/Lymphocytes/3-19-/56+               |
| 38 | /Non-beads/Singlets/45+/Lymphocytes/3-19-/56+/122+          |
| 39 | /Non-beads/Singlets/45+/Lymphocytes/3-19-/56+16-            |
| 40 | /Non-beads/Singlets/45+/Lymphocytes/3-19-/56-16-            |
| 41 | /Non-beads/Singlets/45+/Lymphocytes/3-19-/56-16-/122+       |
| 42 | /Non-beads/Singlets/45+/Lymphocytes/3-19-/56-16-/HLA DR hi  |
| 43 | /Non-beads/Singlets/45+/Lymphocytes/3-19-/56-16-/HLA DR med |
| 44 | /Non-beads/Singlets/45+/Lymphocytes/3-19-/56-16-/HLA DR neg |
| 45 | /Non-beads/Singlets/45+/Lymphocytes/3-19-/56B               |
| 46 | /Non-beads/Singlets/45+/Lymphocytes/3-19-/56B/HLA DR hi     |
| 47 | /Non-beads/Singlets/45+/Lymphocytes/3-19-/56B/HLA DR med    |
| 48 | /Non-beads/Singlets/45+/Lymphocytes/3-19-/56B/HLA DR neg    |
| 49 | /Non-beads/Singlets/45+/Lymphocytes/3-19-/56B16-            |
| 50 | /Non-beads/Singlets/45+/Lymphocytes/3-19-/56D               |
| 51 | /Non-beads/Singlets/45+/Lymphocytes/3-19-/56D/HLA DR hi     |
| 52 | /Non-beads/Singlets/45+/Lymphocytes/3-19-/56D/HLA DR med    |
| 53 | /Non-beads/Singlets/45+/Lymphocytes/3-19-/56D/HLA DR neg    |
| 54 | /Non-beads/Singlets/45+/Lymphocytes/19+                     |
| 55 | /Non-beads/Singlets/45+/Lymphocytes/19+/B CELLS             |
| 56 | /Non-beads/Singlets/45+/Lymphocytes/19+/B CELLS/HLA DR hi   |
| 57 | /Non-beads/Singlets/45+/Lymphocytes/19+/B CELLS/HLA DR med  |
| 58 | /Non-beads/Singlets/45+/Lymphocytes/19+/B CELLS/HLA DR neg  |

Table S7: Manual gating strategy applied to CITN-07 phenotyping panel.

871 **A.12 Myeloid compartment analysis**

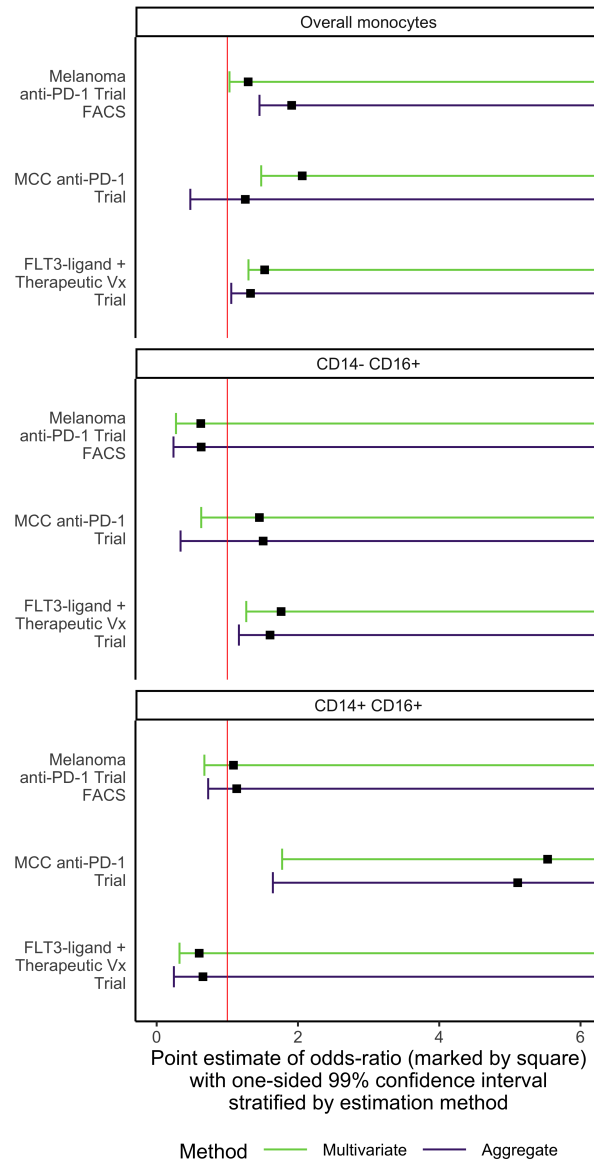

Figure S5: This figure contains results for the remaining compartments from the multivariate and aggregate myeloid compartment analysis described in section 2.4. Here we see the multivariate modeling also reveals evidence of increased abundance in responders across the entire myeloid compartment.

### 872 **A.13 Simulation study**

### 873 **A.14 Summary of simulation results**

874 To better understand the performance of FAUST relative to other methods, we conducted simula-  
875 tion studies that generated data from a variety of mixture models. Since FAUST assumes that each  
876 experimental unit is sampled from a finite mixture model (see Methods 4), all datasets generated  
877 in the study were designed to be compatible with the statistical assumptions underpinning FAUST.  
878 Components of the mixture for each experimental unit are assumed to arise from a common  
879 class of densities, with batch effects and other sources of experimental heterogeneity modeled as  
880 unit-specific changes in location and scale of the underlying mixture components. The mixture  
881 components represent cell sub-populations within a unit.

882 The study generated datasets from a variety of mixture models incorporating different combi-  
883 nations of assumptions, detailed in the following sub-sections. The study begins by simulating  
884 data from multivariate Gaussian distributions (producing datasets which are favorable to many  
885 existing methods) and progressively simulates data that more closely represents flow cytometry  
886 and CyTOF datasets. In the study, we compare FAUST to FlowSOM since, as noted in the main  
887 text, FlowSOM is computationally efficient, is recommended in the review [4], and is used in the  
888 recent *diffCyt* method [18]. Each simulated mixture component (representing a cell sub-population)  
889 is partially parameterized by a mean vector and is given a phenotypic label that describes the  
890 phenotype of the component. By treating these phenotypic labels as ground-truth, we are able to  
891 measure how well the count matrix produced by FAUST agrees with the simulated count matrix,  
892 matching discovered and simulated cell populations based on their phenotypes. FAUST is run  
893 completely unsupervised across all simulation settings.

894 Our results demonstrate that FAUST's discovery and annotation strategy does not severely  
895 over partition the data under a variety of generative regimes (supplementary figure S11). Results  
896 also show that the cell counts derived from FAUST's discovered clusters strongly correlate with  
897 the underlying true counts across all simulation settings. We observe a median correlation  
898 of 0.91 between FAUST and the simulated truth, when cluster counts are correlated between  
899 FAUST clusters and the ground truth using only cluster annotations to perform the comparison  
900 (Supplementary Figure S10).

901 The simulated datasets always include a sub-population that is differentially abundant between

50% of the subjects. Our results show that when we simulate a causal relationship of varying strength between this differential sub-population and a simulated response to therapy, FAUST discovers the differential sub-population, annotates it correctly, and often identifies that the differential population is associated with response to therapy (Supplementary Figures S12, S13, S14).

In the present simulation, FlowSOM clusters are tested for differential abundance under the same causal regimes as FAUST. Our results show that FlowSOM’s ability to detect the causal association is adversely affected when the simulation departs from multivariate normality or when the simulated data contains 50 true clusters and batch effects and/or nuisance variables, even when FlowSOM is provided with the true number of clusters as a tuning parameter. As noted in the main text, this study confirms our empirical finding that FAUST robustly detects signals in data that are not found by other discovery methods.

#### A.14.1 Simulation Goals

The purpose of this simulation study is to assess the performance of the FAUST algorithm, both as a clustering tool and as a discovery tool. datasets are simulated from mixture models following the assumptions of section 4.1. The simulation measures how well FAUST recovers the underlying mixture under a variety of parametric scenarios. The simulation also measures how well FAUST is able to detect a sub-population, elevated in half the samples, that is required to have causal relationship (of varying strength) with a subject’s response to therapy. We compare the performance of FAUST to the performance of the FlowSOM clustering algorithm [5].

#### A.14.2 Baseline simulation description

The basic simulation generates an experimental data collection containing 100 independent samples of 10-dimensional data from a Gaussian mixture model with 10 components. A probability vector

$$\mathbf{p} \sim \text{Dirichlet}(\alpha \equiv (1, 1, \dots, 1)) \tag{A.7}$$

of dimension equal to the number of mixture components is generated. In a given simulation iteration, sampling from the Dirichlet continues until all elements are greater or equal to 0.001.

There are four tuning parameters that modify this baseline setting. We will first give a complete

description of how the simulation study works at baseline, and then will describe how the tuning parameters modify the baseline study.

In the basic setting, the size of each of the 100 samples is  $n_j = \max(5000, s)$ ,  $1 \leq j \leq 100$ , where  $s \sim T(\mu = 10000, \nu = 3)$  is a sample from a non-central  $T$  distribution with 3 degrees of freedom and non-centrality parameter 10000. Each sample is meant to represent a sample taken from a subject in an immunology study and then interrogated via flow cytometry.

Before generating the samples, a fixed collection of mean vectors  $\mu_c$ ,  $1 \leq c \leq 10$  is determined for the ten Gaussian mixture components that is used across all simulated samples. Each of the ten entries of  $\mu_c$  are randomly selected from the columns of table S8, and represent whether or not the measured variable exhibits a signal. When an entry of  $\mu_c$  is from the "No Signal" row of table S8, the corresponding variable is labeled "-". Similarly, when an entry of  $\mu_c$  is from the "Signal" row of table S8, the corresponding variable is labeled "+". An example, the annotation "V1- V2- V3+ V4- V5+ V6- V7- V8- V9+ V10-" indicates the mean vector  $\mu_c$  of the mixture component contains 0 for V1, V2, V4, V6, V7, V8, and V10, while it is 7 for V3, 6 for V5, and 4 for V9. Each mean vector is associated with an element of the probability vector (A.7). Covariance matrices  $\Sigma_c$  are always constrained to have variances between 1 and 2, but otherwise are randomly generated sample-by-sample and component-by-component.

Table S8: Possible mean vector entries for the ten simulation variables.

|           | V1 | V2 | V3 | V4 | V5 | V6 | V7 | V8 | V9 | V10 |
|-----------|----|----|----|----|----|----|----|----|----|-----|
| No Signal | 0  | 0  | 0  | 0  | 0  | 0  | 0  | 0  | 0  | 0   |
| Signal    | 8  | 8  | 7  | 7  | 6  | 6  | 5  | 5  | 4  | 4   |

Each simulation iteration, 50 of the 100 samples are randomly selected to have a mixture component elevated. Without loss of generality, suppose (A.7) is in sorted order, so that the first entry  $p_1$  is the largest value, the tenth entry  $p_{10}$  is the smallest value, and intermediate entries correspond to their order statistics. In the non-elevated samples, the mean-vector  $\mu_c$  associated with the smallest element of the probability vector (A.7),  $p_{10}$ , is identified as the cluster component to elevate. In the samples randomly selected for elevation, the probability vector (A.7) is modified



as follows. The numerical value  $p_{\text{target}} \equiv p_7$  is fixed. Next, the intermediate probability vector

$$\begin{aligned} \mathbf{P}_{\text{int}} &\equiv \left( p_1 + \frac{p_{10}}{9}, p_2 + \frac{p_{10}}{9}, \dots, p_9 + \frac{p_{10}}{9}, 0 \right) \\ &\equiv (q_1, q_2, \dots, q_9, 0) \end{aligned} \quad (\text{A.8})$$

is generated. Then (A.8) is modified so that

$$\begin{aligned} \mathbf{P}_{\text{elevated}} &\equiv (q_1 - q_1 \cdot p_{\text{target}}, q_2 - q_2 \cdot p_{\text{target}}, \dots, q_9 - q_9 \cdot p_{\text{target}}, p_{\text{target}}) \\ &\equiv (r_1, r_2, \dots, r_9, r_{10}). \end{aligned} \quad (\text{A.9})$$

943 The transformation from (A.7) to (A.9) causes the identified population to be, on average, the 7<sup>th</sup>  
 944 largest mixture component in half the samples, and the smallest mixture component in the other  
 945 half.

946 A sample of size  $n_j$  with  $1 \leq j \leq 100$  is generated by first determining the relative size of  
 947 each mixture component within the sample. When the sample is selected as having the elevated  
 948 population, the size of mixture components is determined by taking a sample from a multinomial  
 949 distribution with  $n_j$  trials and cell probabilities determined by (A.9). Otherwise, the size of mixture  
 950 components is determined by taking a sample from a multinomial distribution with  $n_j$  trials and  
 951 cell probabilities determined by (A.7). In both cases, the resulting multinomial vector is then used  
 952 to sample multivariate Gaussian samples of the corresponding size, with mean vectors  $\mu_c + e_{c,j}$  and  
 953 covariance matrices  $\Sigma_c$ , for  $1 \leq c \leq 10$ . The vector  $e_{c,j} = (e_{c,j,1}, \dots, e_{c,j,10})$  is determined by taking  
 954 a 10 independent samples  $\epsilon_{c,j,k} \sim N(0, 1/2)$ ,  $1 \leq k \leq 10$ , and then rounding  $e_{c,j,k} = \text{round}(\epsilon_{c,j,k})$   
 955 to the nearest integer. The vector  $e_{c,j}$  models sample-specific perturbations (corresponding to  
 956 subject-level effects) without modifying (with high probability) the semantic interpretation of the  
 957 annotations corresponding to  $\mu_c$ . A visualization of the baseline experiment is provided in figure  
 958 S6.

959 Once the experimental data is generated, it is processed by FAUST in a completely unsupervised  
 960 setting. FAUST is set to use individual samples as the experimental unit. All simulated variables  
 961 are taken as admissible and the channel boundaries are set to the entire real line for all markers. The  
 962 depth score selection threshold is set to 0.01, the depth score selection quantile is set to the median,  
 963 and the phenotype occurrence number is set to 25. The 100 samples are also concatenated and

964 clustered by the FlowSOM algorithm in two different ways. First, following the recommendation  
965 of [49], the FlowSOM grid is set to  $1 \times$  Number of mixture components to simulate one best case  
966 scenario: an oracle provides FlowSOM with the true number of clusters. Second, similar to the  
967 approach of [18], FlowSOM overpartitions the data by setting the grid to  $5 \times 5$  (assuming 25  
968 clusters when in truth there are 10).

969 To test how well each of the three methods discover sub-populations associated with differential  
970 abundance, a binary response is generated for each sample in the experiment. For samples where  
971 the identified population is elevated, a probability of response  $p_{response}$  is varied from 0.50 to 0.80  
972 in increments of 0.05. Each elevated sample is then associated with a response status by sampling  
973 from a Bernoulli( $p_{response}$ ). Similarly, samples where the identified population is not elevated  
974 are given a probability of response  $q_{response} \equiv 1 - p_{response}$ . Each non-elevated sample is then  
975 associated with a response status by sampling from a Bernoulli( $q_{response}$ ).

976 Once samples are associated with a binary outcome, the clusters produced by each of the  
977 three approaches are tested for differential abundance following the strategy described in section  
978 A equation (4.5). P-values are adjusted for FDR (q-values) using the method [24]. In the event  
979 FAUST discovers the elevated population by exact annotation, the associate q-value is recorded.  
980 For FlowSOM, the "best" q-value is defined as follows. Both the cluster containing the largest  
981 number of observations from the elevated population in terms of absolute counts, and the cluster  
982 containing proportionally the most observation from the elevated population are identified. The  
983 minimum q-value from the two clusters (when different) is recorded for both the oracle FlowSOM  
984 and overpartitioned FlowSOM clusterings.

985 We repeat this modeling procedure 50 times for each setting of  $p_{response}$ . The median q-values  
986 across each of the 50 iterations is recorded in a single simulation iteration. We then repeat the  
987 entire experimental simulation 50 times, and report the median of median q-values across those  
988 50 simulation runs. In addition, we compute F-measures of the clusterings, along with several  
989 other measures of the quality of the FAUST clusterings. We will describe these measurements in  
990 the coming figures. Before doing so, we will provide details about simulation tuning parameters.

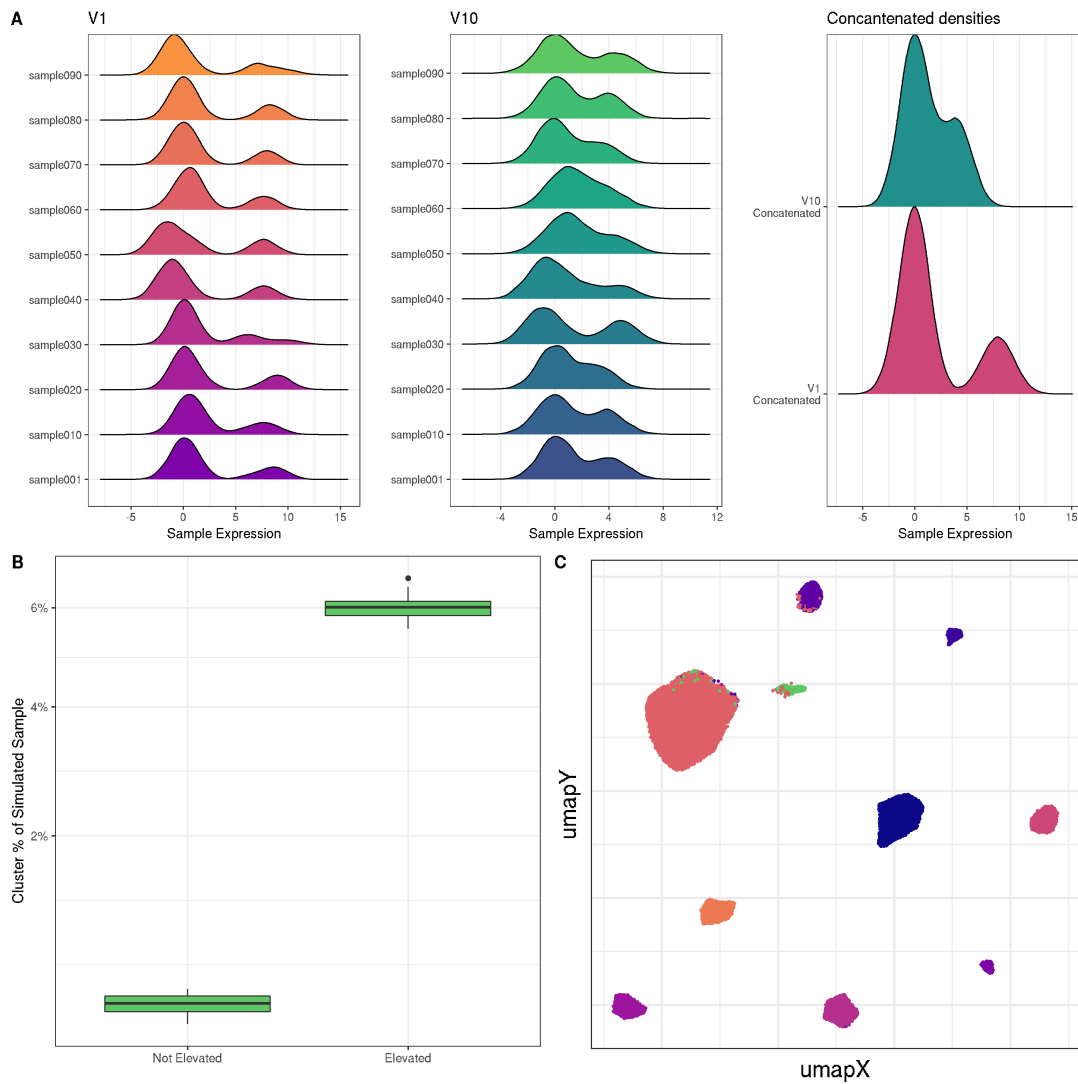

Figure S6: Visual summary of baseline simulation. Panel A shows the best separated variable (V1), worst separated (V10), and their concatenation across 10 samples. Panel B shows the elevated population across the entire 100 sample experiment. Panel C shows the umap generated from the 10 concatenated samples.

### 991 A.14.3 Simulation tuning parameters

992 The first simulation parameter we vary is the underlying number of mixture components: we set  
 993 this parameter to 25 components and 50 components, in addition to the baseline of 10. While the  
 994 sample sizes are random, we do not change the underlying sampling scheme, which introduces  
 995 rarer and rarer populations appear across simulations as the number of mixture components  
 996 increase. In both the 25 and 50 component setting, the probability vector (A.7) is expanded

997 accordingly;  $\alpha$  continues to be set to 1 for each component. In all cases, sampling from the  
998 Dirichlet continues until all elements are greater or equal to 0.001. In the 25 component setting,  
999 the elevated population has  $p_{\text{target}}$  set to  $p_{18}$ ; in the 50 component setting,  $p_{\text{target}}$  is set to  $p_{35}$ .

1000 The second simulation parameter we vary is used to add a batch effect to the simulation. The  
1001 batch effect is modeled as a translation of the underlying mean vector. Batches are modeled  
1002 as groups of 10 samples. After the initial 10 samples are generated, the mean vectors of the  
1003 Gaussian mixture components (sampled from (S8)) are translated by a constant vector  $\lambda_1 =$   
1004  $(1/3, 1/3, \dots, 1/3)$ . After the next 10 samples are generated, the translate increases to the constant  
1005 vector  $\lambda_2 = (2/3, 2/3, \dots, 2/3)$ . This continues in groups of 10 until the final 10 samples are  
1006 translated by  $\lambda_9 = (9/3, 9/3, \dots, 9/3)$ . Figure S7 illustrates an example of a simulated experiment  
1007 with 50 mixture components and the batch effect parameter turned on.

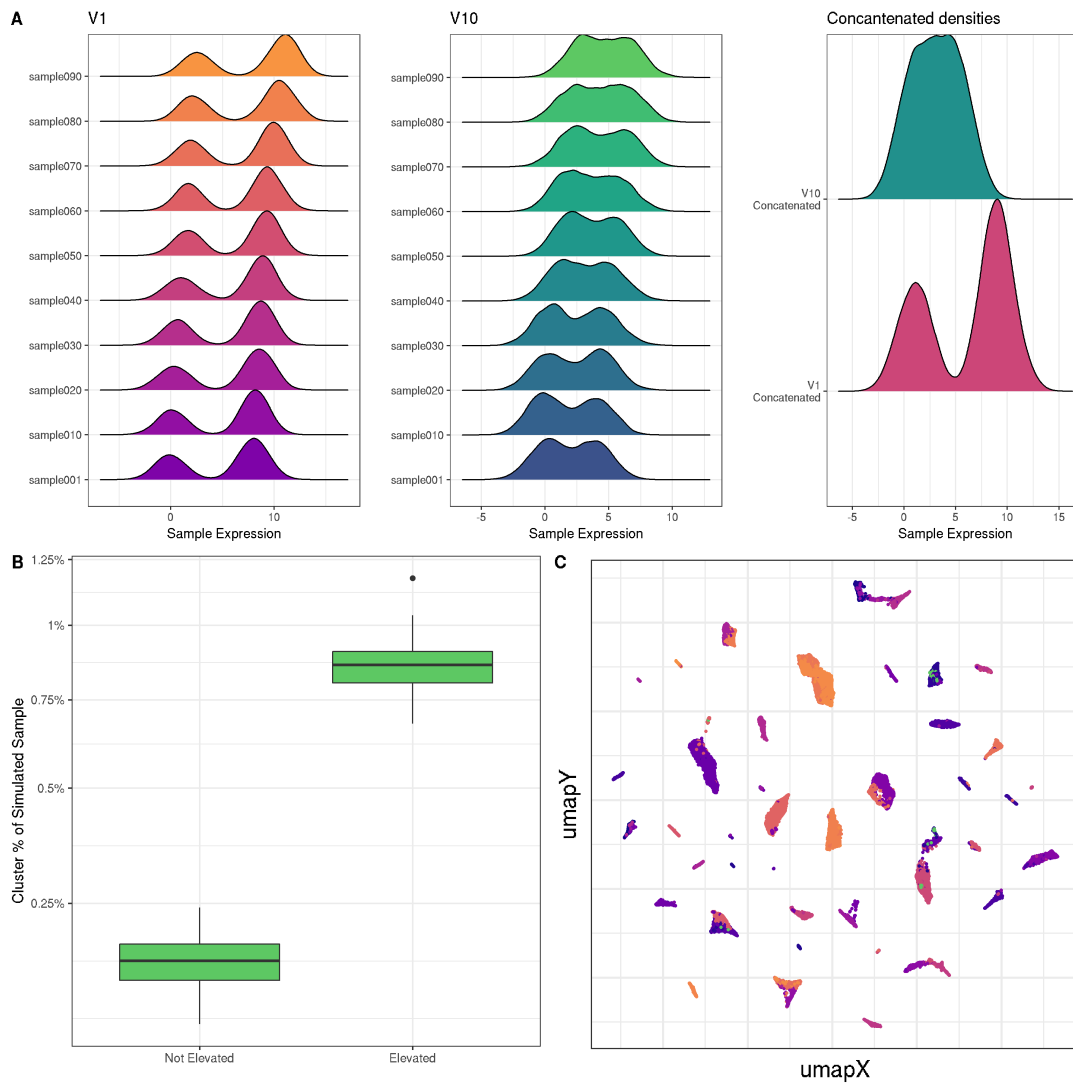

Figure S7: Visual summary of simulation modified from baseline with 50 mixture components and a batch effect turned on. Panel A shows the best separated variable (V1), worst separated (V10), and their concatenation across 10 samples. Panel B shows the elevated population across the entire 100 sample experiment. Panel C shows the umap generated from the 10 concatenated samples.

1008 The third simulation parameter controls whether or not we add nuisance variables to the  
 1009 simulation. This parameter is meant to generate data under the scenario that several markers in  
 1010 the panel are uninformative because of staining issues. When this parameter is turned on the  
 1011 following occurs. Each time a sample of size  $n_j$  is generate, an independent sample of size  $n_j$  it  
 1012 taken from a Multivariate Gaussian distribution centered at  $\mu_{\text{nuisance}} = (5, 5, 5, 5, 5)$ , and  $\Sigma_{\text{nuisance}}$

1013 constrained to have variances between 1 and 2 but otherwise random. The independent Gaussian  
 1014 sample is then adjoined to the mixture of size  $n_j$ , producing a simulated dataset in 15 dimensions.  
 1015 Since nuisance variables are independently generated, they do not affect the mixture structure of a  
 1016 given simulation; consequently, Consequently, the underlying annotations of observations by their  
 1017 cluster component mean vector are not changed when the nuisance variables are added to the  
 1018 simulation.

1019 The final simulation parameter is used to investigate departures from normality. We explored  
 1020 two possible settings: after generating each sample, the data are transformed coordinate-by-  
 1021 coordinate through the square map  $f(x) = x^2$  or the gamma map  $g(x) = \Gamma(1 + (|x/4))$ . The  
 1022 square map was used to investigate a mild departure from Normality, while we used the gamma  
 1023 map to transform the mixture into data that looked similar to CyTOF. Under the gamma map, we  
 1024 modify the space possible Gaussian mean vectors (S8) to those determined by table (S9). Figure  
 1025 S8 illustrates an example of a simulated experiment with 25 mixture components, both the batch  
 1026 effect parameter and nuisance variable parameters turned on, and data are transformed by the  
 1027 Gamma map.

Table S9: Possible mean vector entries for the ten simulation variables when data subsequently transformed by the map  $g(x) = \Gamma(1 + (|x/4))$ .

|           | V1 | V2 | V3 | V4 | V5 | V6 | V7 | V8 | V9 | V10 |
|-----------|----|----|----|----|----|----|----|----|----|-----|
| No Signal | 0  | 0  | 0  | 0  | 0  | 0  | 0  | 0  | 0  | 0   |
| Signal    | 8  | 8  | 8  | 7  | 7  | 7  | 7  | 6  | 6  | 6   |

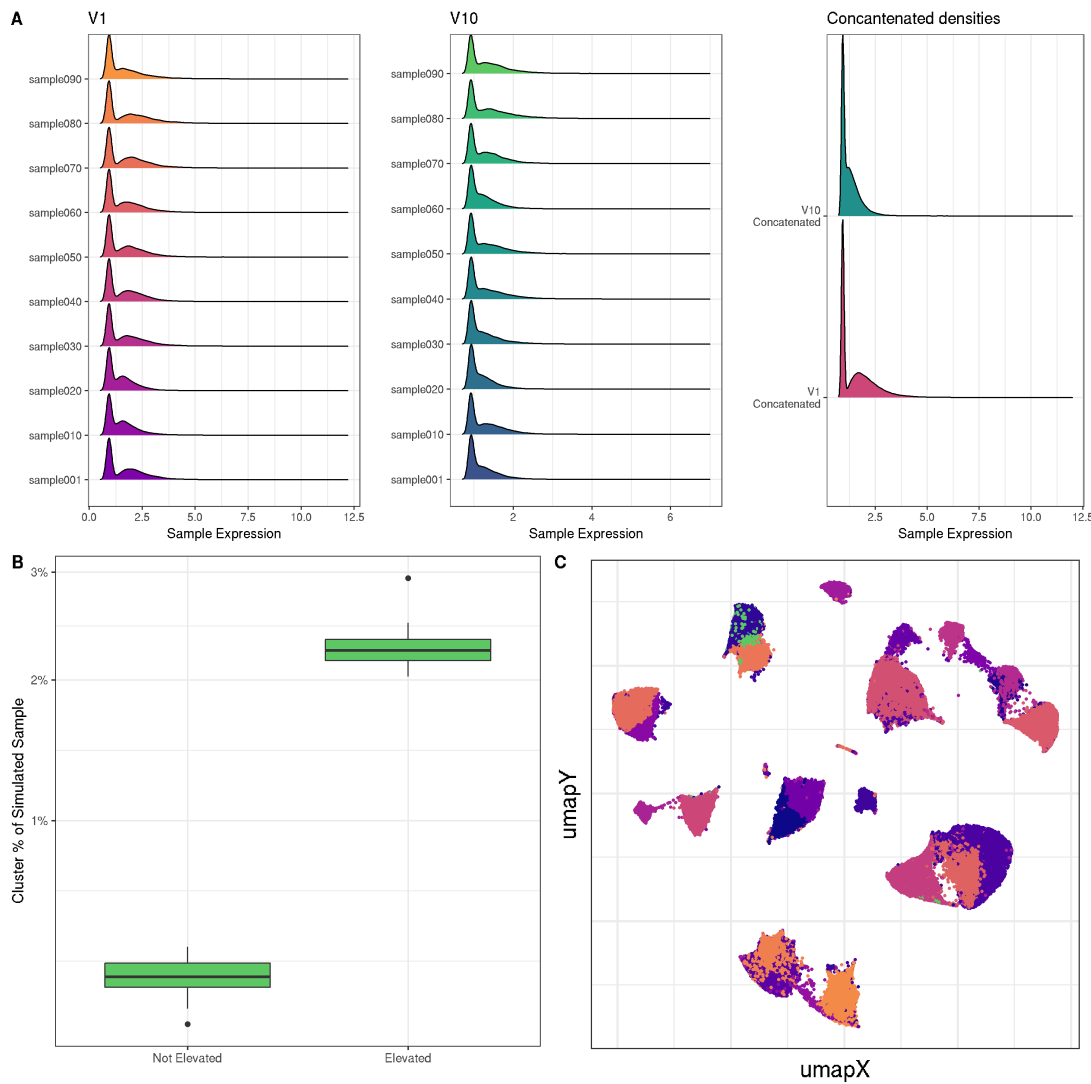

Figure S8: Visual summary of simulation modified from baseline with 25 mixture components, batch effect turned on, nuisance variable turned on, and data transformed coordinate-wise by the map  $g(x) = \Gamma(1 + |(x/4)|)$  after generation. Panel A shows the best separated variable (V1), worst separated (V10), and their concatenation across 10 samples. Panel B shows the elevated population across the entire 100 sample experiment. Panel C shows the umap generated from the 10 concatenated samples.

#### 1028 A.14.4 Simulation results

1029 By adjusting the tuning parameters described in supplementary section A.14.3, we explore 36  
 1030 distinct scenarios *in silico*. Each simulation setting is run 50 times, with three exceptions which  
 1031 we now report. The scenario of 25 Clusters with no batch effect but with nuisance variables

1032 transformed by the gamma map completed 34 iterations. The scenario of 25 Clusters with batch  
1033 effect but with no nuisance variables transformed by the gamma map completed 37 iterations.  
1034 The scenario of 50 Clusters with batch effect and with nuisance untransformed (the identity  
1035 map) completed 35 iterations. Based on their log files, these three scenarios did not complete  
1036 50 iterations in 7 days of compute time due to generating experiments in which the regression  
1037 modeling took unusually long to fit to each cluster.

1038 This simulation study shows that departures from multivariate-normality as well as batch-  
1039 effects combined with large numbers of clusters impair FlowSOM's ability to define clusters  
1040 that correlate with outcome. FAUST, on the other hand, performed robustly across simulation  
1041 settings since its key methodological assumption is that some subset of the measured markers in  
1042 a cytometry dataset are marginally separated into modal groups. In samples that both contain  
1043 heterogeneous cell populations (such as live lymphocytes) and are stained by a large marker panel,  
1044 we have empirically seen this assumption is always met. Plots of the observed expression data  
1045 show the MCC anti-PD1 dataset has non-Gaussian characteristics, and also has sample-to-sample  
1046 variation which is common in many cytometry experiments. Hence, the non-Gaussian nature of  
1047 the MCC anti-PD1 trial data combined with sample-to-sample variation both contribute to the  
1048 discovery differences observed between FlowSOM and FAUST.



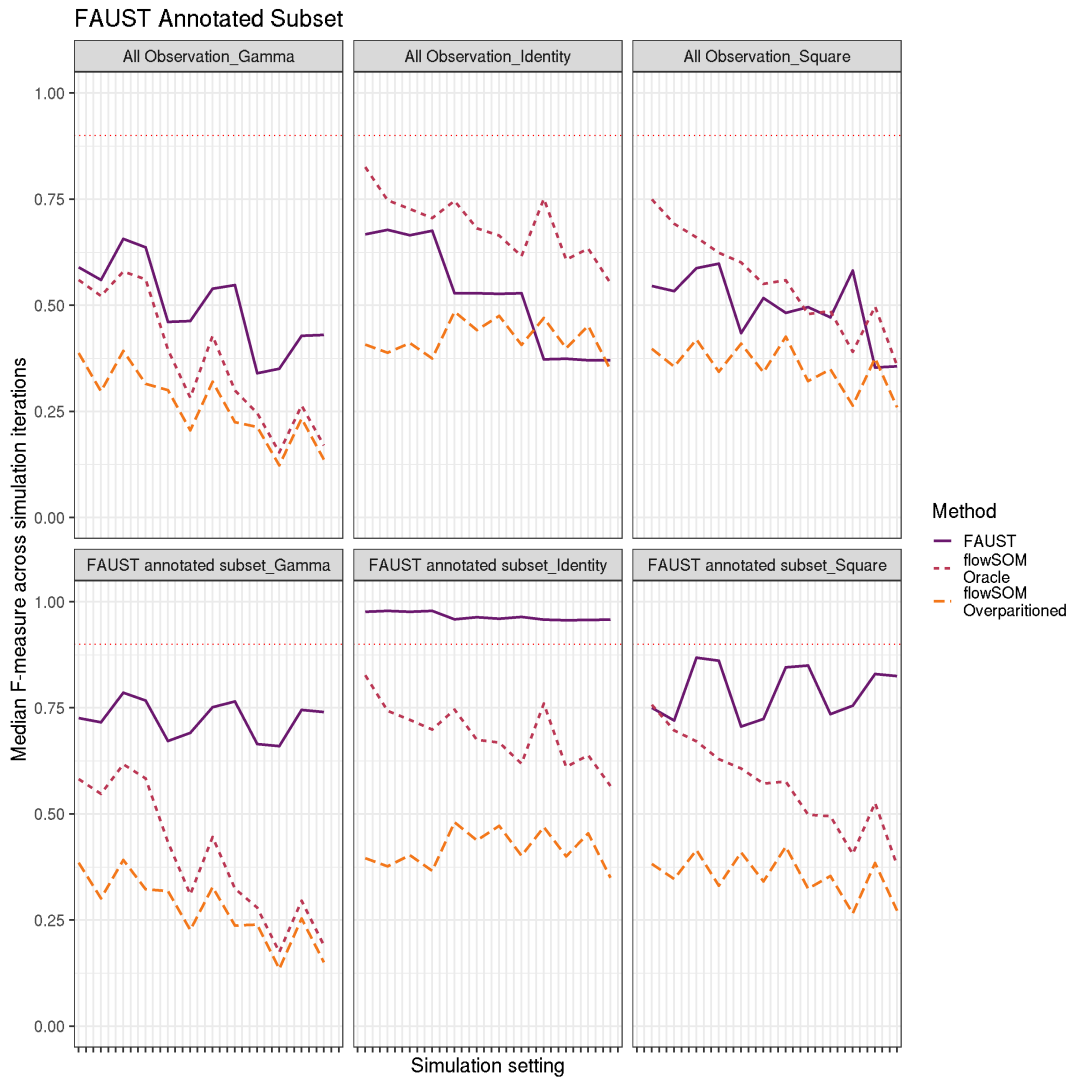

Figure S9: The median F-measure across the 50 simulation iterations (with 3 exceptions). Results are stratified by transformation type:  $h(x) = x$  (identity map);  $f(x) = x^2$  (square map);  $g(x) = \Gamma(1 + (|x|/4))$  (gamma map). F-measures are computed between each method's clustering and the entire simulated dataset (row 1). F-measures are also computed between each method and the subset of observations that FAUST annotates (row 2). The figures show FAUST improves markedly (in terms of F-measure) on the set of labeled observations it labels, while the F-measure of FlowSOM with an oracle and FlowSOM overpartitioned perform similarly on the two sets. This figure provides a demonstration of the difficulty of comparing FAUST clusterings to computational methods in current use: classic measures of clustering performance, such as the F-measure, do not directly account for the biological information present in FAUST annotations. We have observed similar trends in other clustering metrics, such as the adjusted rand index (data not shown). When the annotated subset is compared to associated subset of the ground truth, FAUST's performance improves markedly in terms of F-measure, while FlowSOM shows no noticeable improvement on the subset.

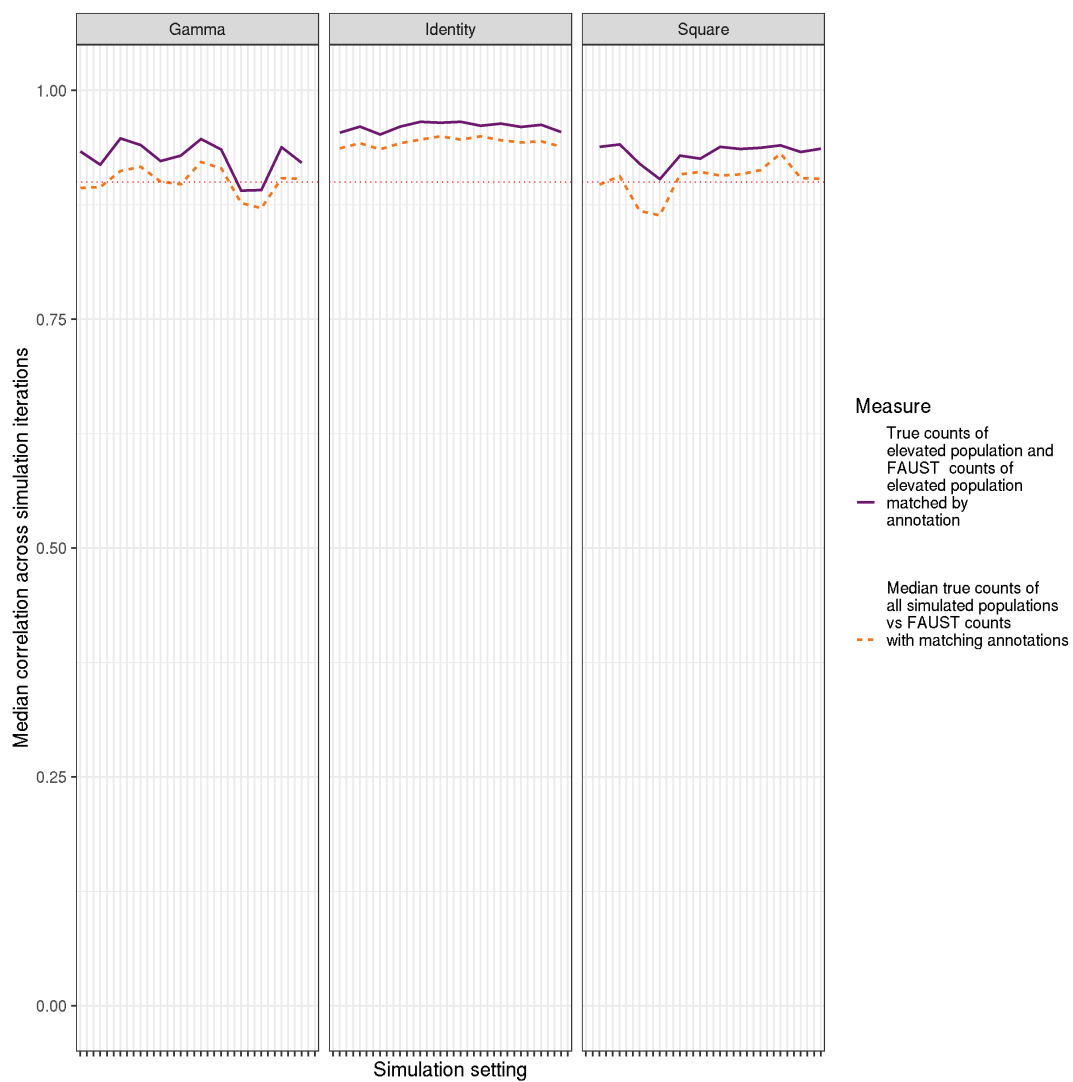

Figure S10: Dashed line: median correlation across 50 simulation between all FAUST clusters and all simulated true populations Solid line: median correlation across 50 simulations between FAUST cluster with differential abundant population and simulated differentially abundant cluster. Correlations are determined only using annotations.

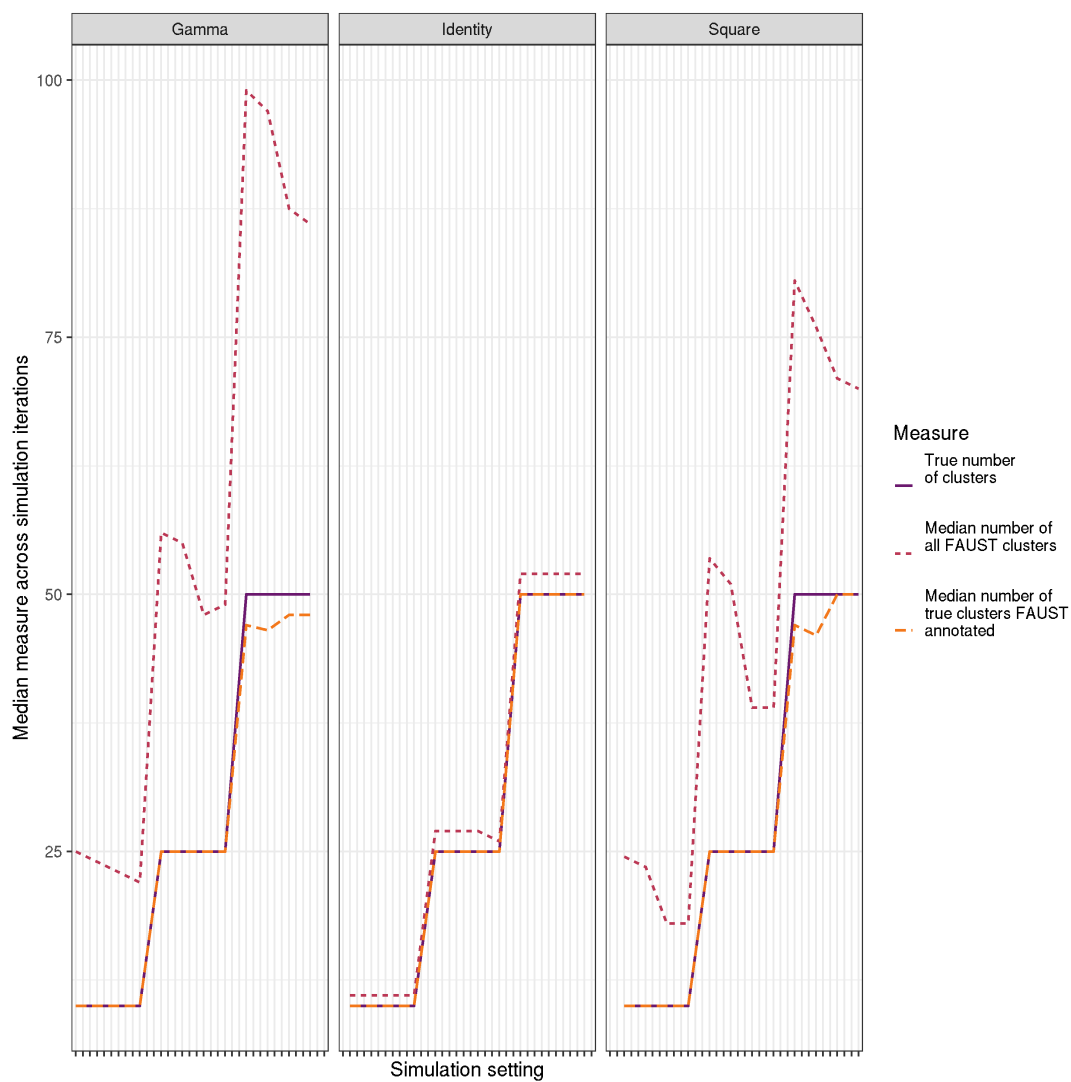

Figure S11: The true number of clusters by simulation setting is the solid purple line. The dashed orange line shows the median number of clusters matching the true annotations produced by FAUST across simulation settings. The dot-dashed red line show the median number of total annotated clusters produced by FAUST across simulation settings.

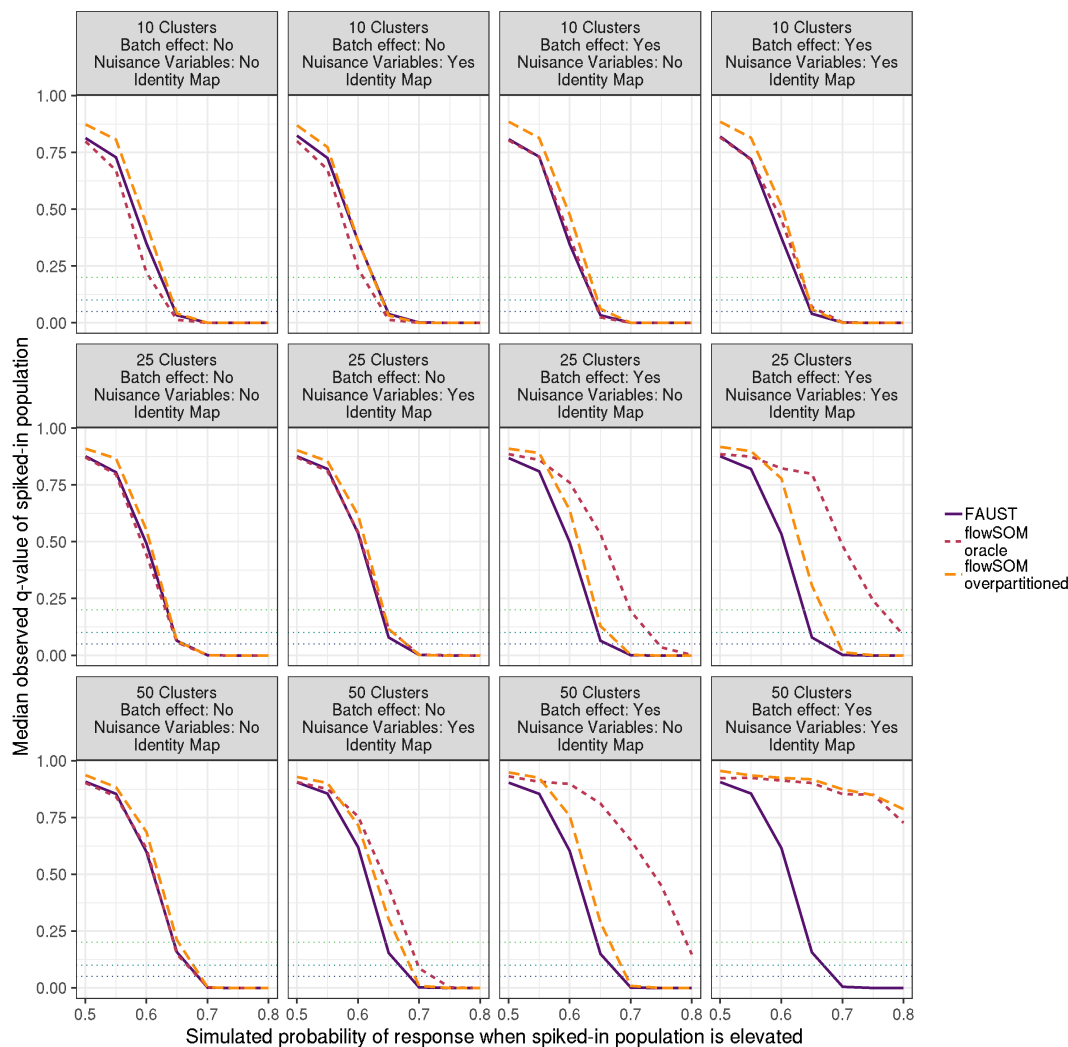

Figure S12: In each simulation, a differentially abundant sub-population is always simulated: 50 subjects have increased abundance relative to the other 50 subjects. For subjects with increased abundance, a stochastic response to therapy is then 50 times, with the response rate for subjects with increased abundance varying along the x-axis. Median FDR-adjusted p-value of FAUST cluster annotated with the differentially abundant population, and median FDR-adjusted for FlowSOM clusters identified as the true clusters are reported across 50 iterations. This plot reports performance when data are generated from a multivariate normal mixture, with different simulation settings.

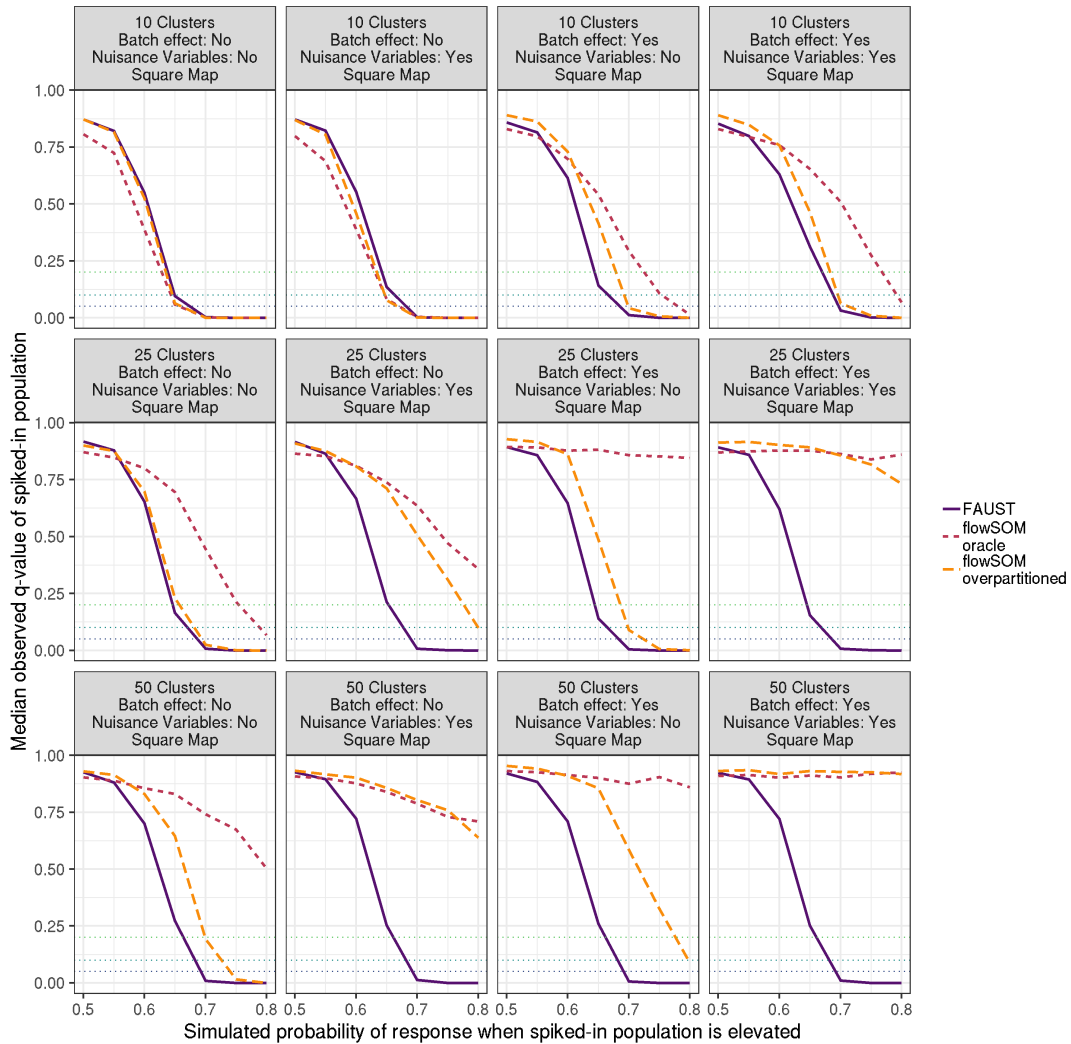

Figure S13: In each simulation, a differentially abundant sub-population is always simulated: 50 subjects have increased abundance relative to the other 50 subjects. For subjects with increased abundance, a stochastic response to therapy is then 50 times, with the response rate for subjects with increased abundance varying along the x-axis. Median FDR-adjusted p-value of FAUST cluster annotated with the differentially abundant population, and median FDR-adjusted for FlowSOM clusters identified as the true clusters are reported across 50 iterations. This plot reports performance when data are transformed by the coordinate map  $f(x) = x^2$ , with different simulation settings.

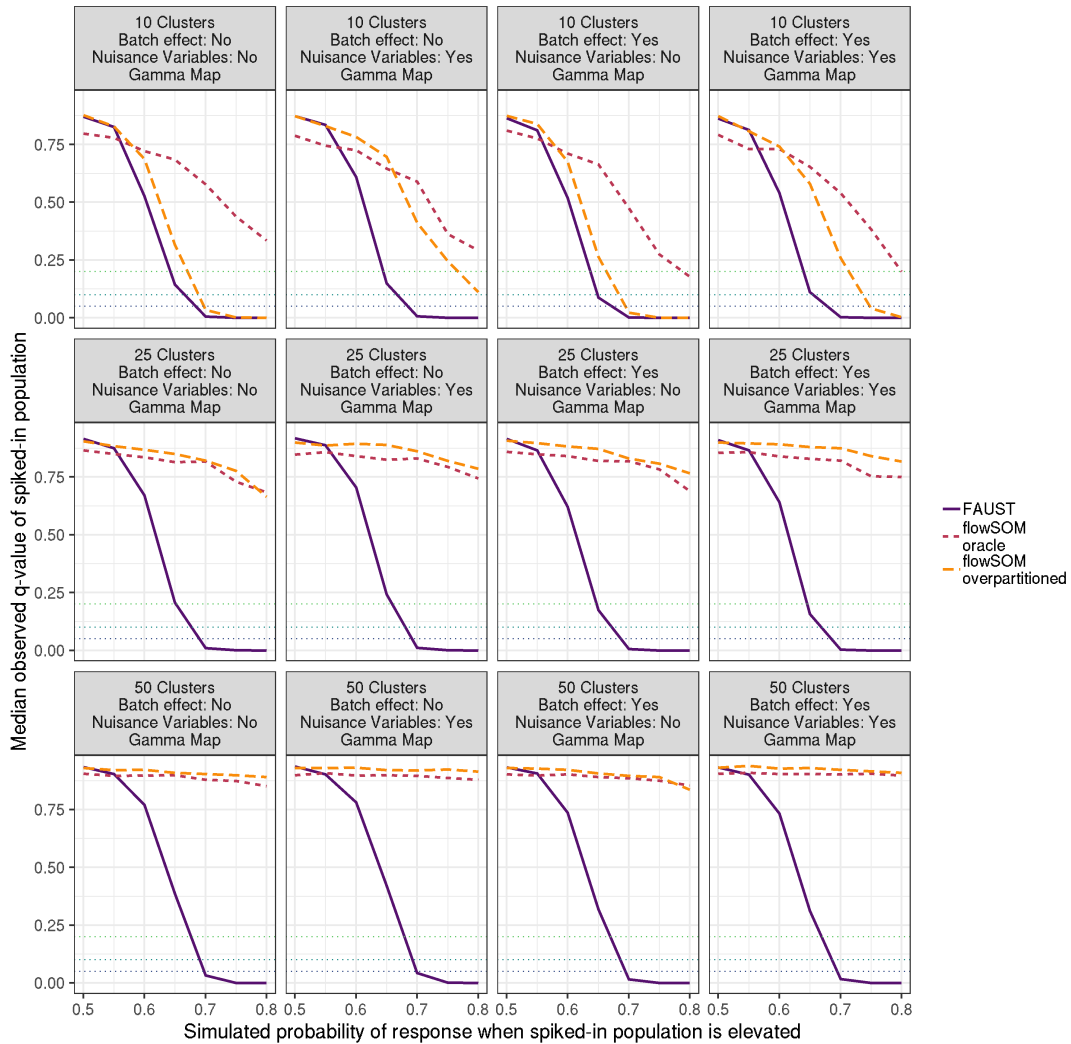

Figure S14: In each simulation, a differentially abundant sub-population is always simulated: 50 subjects have increased abundance relative to the other 50 subjects. For subjects with increased abundance, a stochastic response to therapy is then 50 times, with the response rate for subjects with increased abundance varying along the x-axis. Median FDR-adjusted p-value of FAUST cluster annotated with the differentially abundant population, and median FDR-adjusted for FlowSOM clusters identified as the true clusters are reported across 50 iterations. This plot reports performance when data are transformed by the coordinate map  $g(x) = \Gamma(1 + |x/4|)$ , with different simulation settings
